# Supplementary material for: Genetic repertoires of anaerobic microbiomes driving generation of biogas
Source: PubMed Central journal article supplement (PMC6146632; doi:10.1186/s13068-018-1258-x), 2018-09-20
Supplement: 13068_2018_1258_MOESM7_ESM.pdf [file 13068_2018_1258_MOESM7_ESM.pdf]

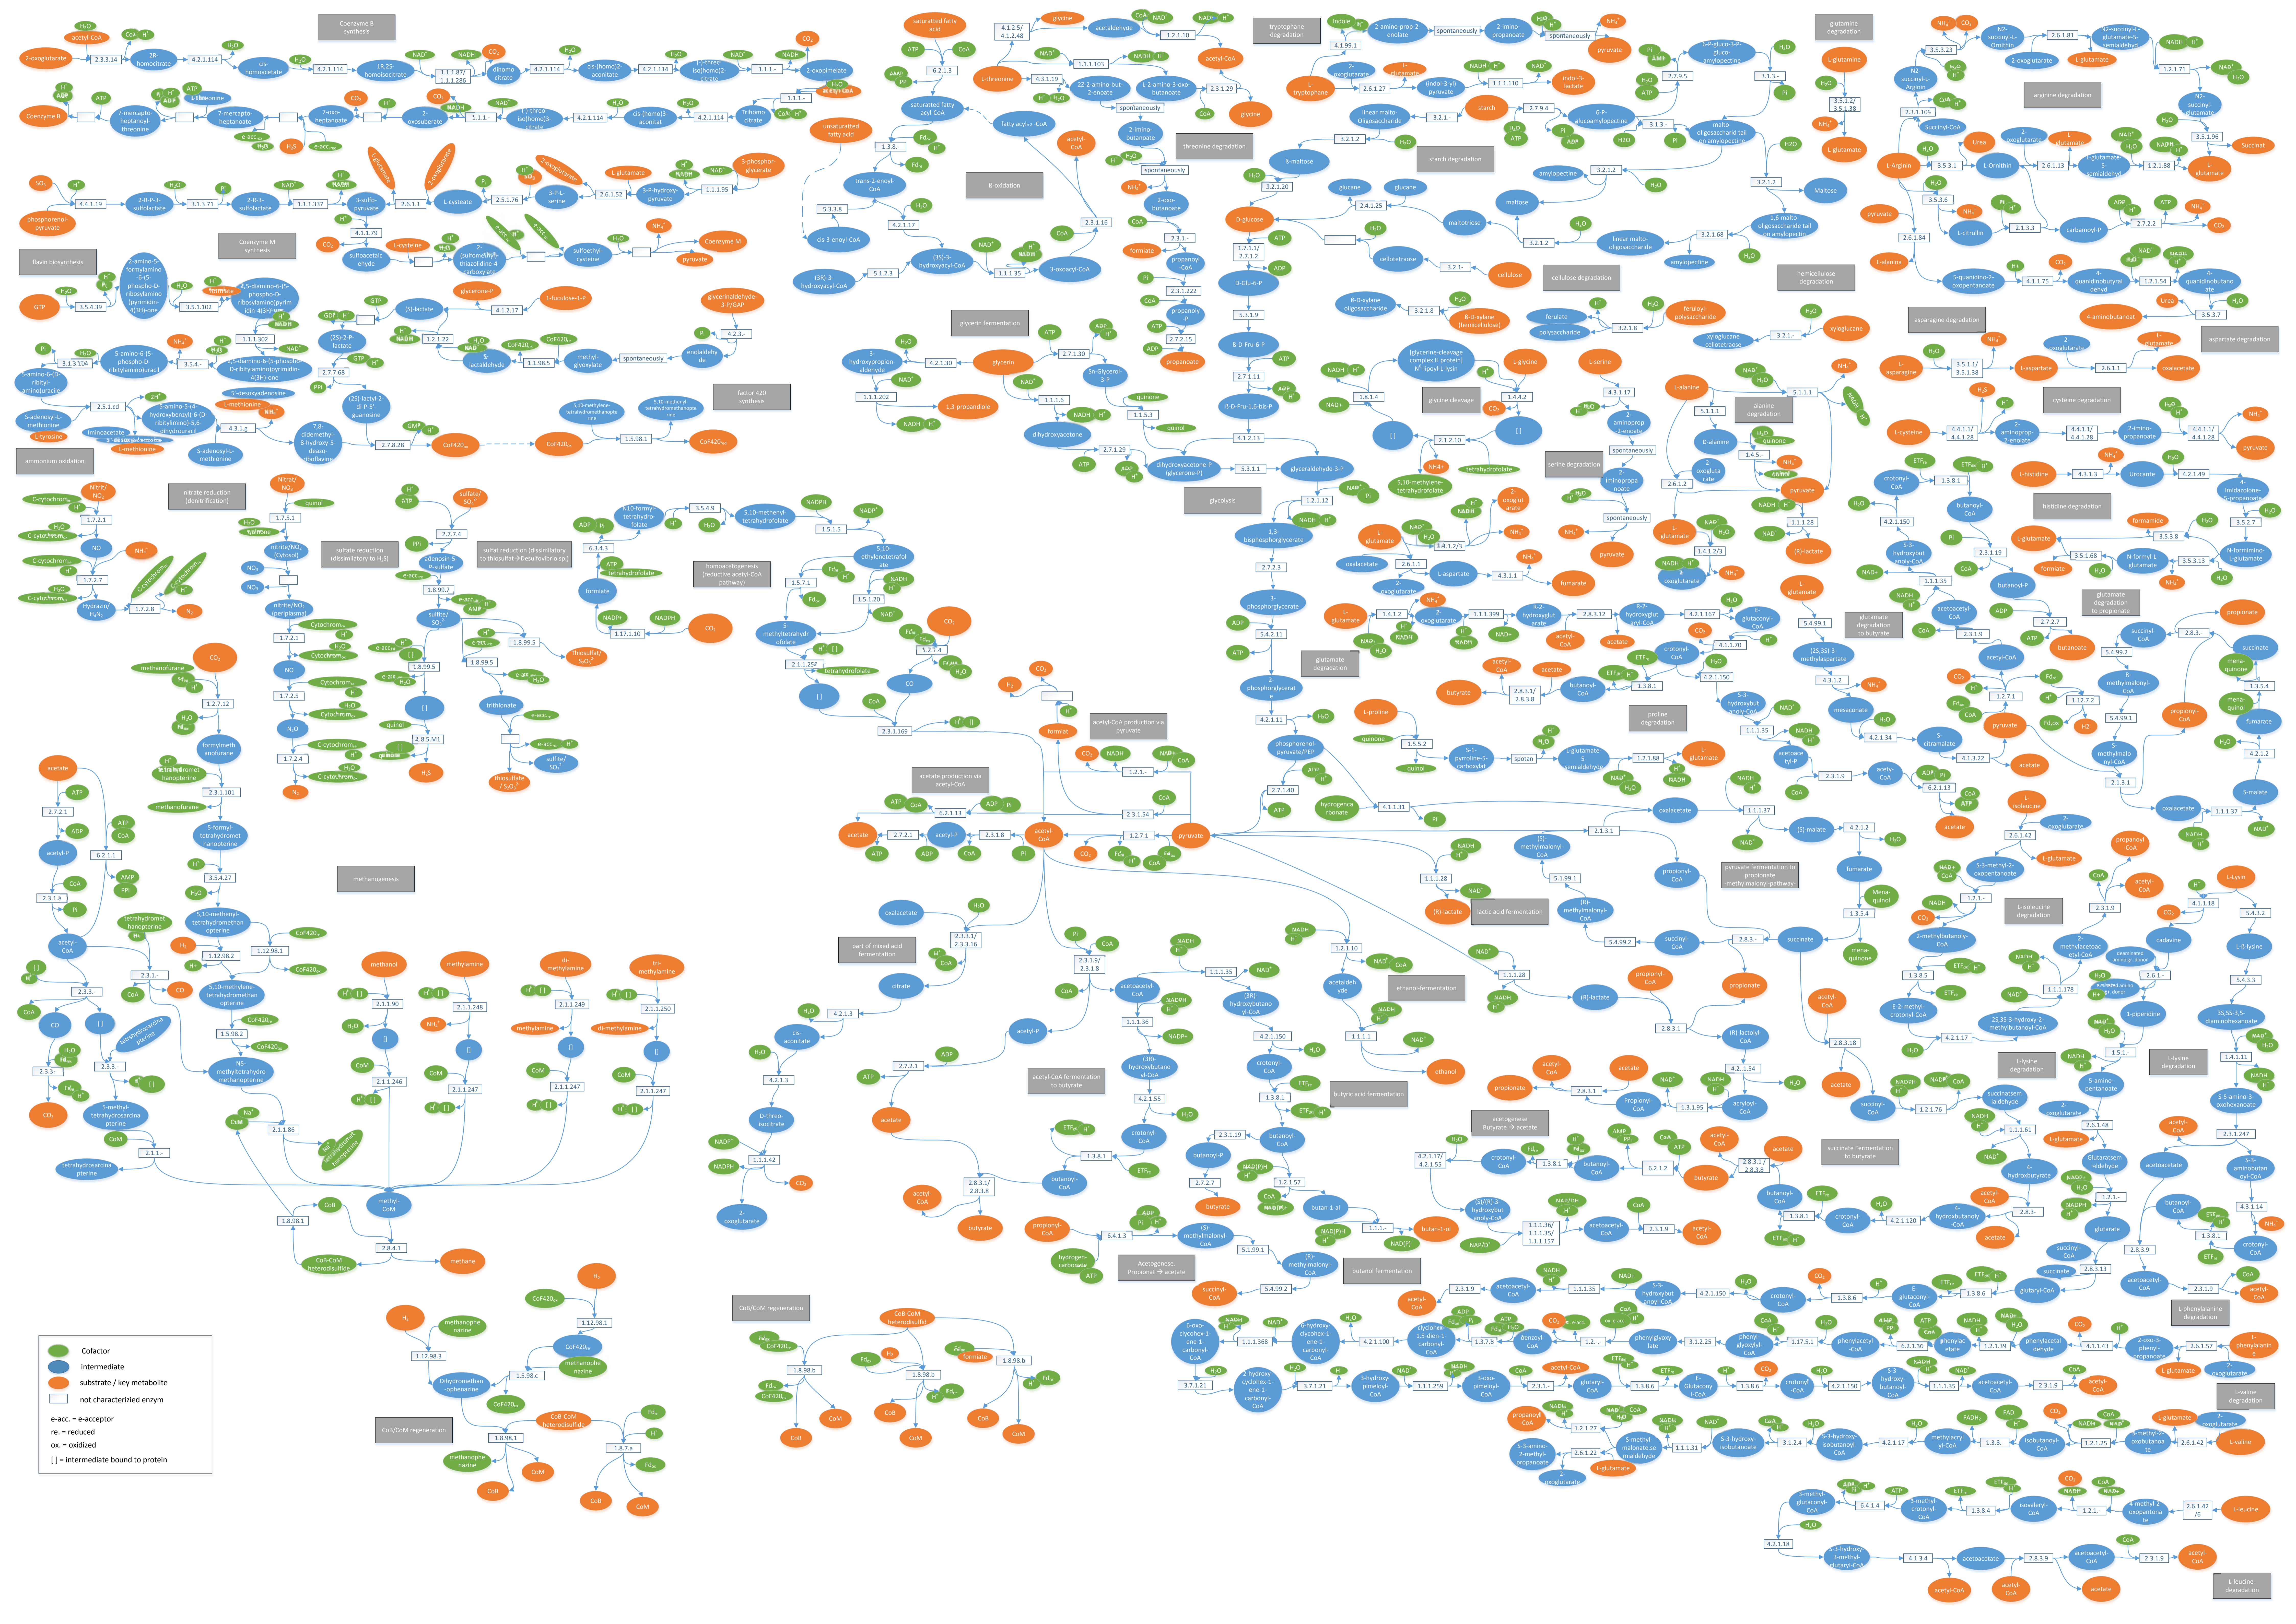

**Legend:**

- Cofactor
- intermediate
- substrate / key metabolite
- not characterized enzyme

**Enzyme Notation:**

- e-acc. = e-acceptor
- re. = reduced
- ox. = oxidized
- [ ] = intermediate bound to protein
