# Supplementary material for: Genetic repertoires of anaerobic microbiomes driving generation of biogas
Source: Biotechnol Biofuels. 2018 Sep 20;11:255. doi: 10.1186/s13068-018-1258-x (PMC6146632; doi:10.1186/s13068-018-1258-x)
Supplement: Supplementary file 6 — Additional file 6. Annotated list of top 500 differentially expressed transcripts. [file 13068_2018_1258_MOESM6_ESM.xlsx]

## Sheet: legend
	worsheet "Log2.RPKM.500UP.BioMETHA_GO"
	sorting order	sorting order after resorting the log2 RPKM matrix according to mean abundance
	GeneID	automatically assigned unique gene identifier, according to InterProScan annotation
	R1/2 d42/84	Log2 RPKM value for laboratory reactors (R1, R2 ) at different time points (d42, d84)
	locus_tag	automatically assigned unique gene identifier, generated by Prokka
	genomic bin	BioMETHA genomic bin ID
	GO Term name	Gene Ontology Term name
	eC_number	The Enzyme Commission number (EC number)
	Gene Name	systematic gene name
	Inference	protein prediction method
	Product	gene product description

## Sheet: Log2.RPKM.500UP.BioMETHA_GO
sorting order	GeneID	R1d42	R2d42	R1d84	R2d84	locus_tag	genomic bin	GO Term name	eC_number	Gene Name	Inference	Product
1	bin_75_contig00036:15029-15976	7.06	6.55	6.59	6.15	renamed_bin_75_01639	renamed_bin_75	GO:0006730|GO:0018759	3.5.4.27	mch	ab initio prediction:Prodigal:2.6,similar to AA sequence:UniProtKB:O28344	Methenyltetrahydromethanopterin cyclohydrolase
2	bin_51_contig00016:432-677	6.28	6.57	6.83	6.68	renamed_bin_51_00979	renamed_bin_51	GO:0003677		abrB	ab initio prediction:Prodigal:2.6,similar to AA sequence:UniProtKB:P08874	Transition state regulatory protein AbrB
3	bin_36_contig00017:5452-5886	6.02	6.03	7.43	6.89	renamed_bin_36_01104	renamed_bin_36	GO:0006879|GO:0008199	1.16.-.-	dps	ab initio prediction:Prodigal:2.6,similar to AA sequence:UniProtKB:P43313	DNA protection during starvation protein
4	bin_126_contig00020:3812-6781	6.77	6.61	6.5	6.49	renamed_bin_126_00800	renamed_bin_126	GO:0005975|GO:0030246	3.2.1.41	pulA_1	ab initio prediction:Prodigal:2.6,similar to AA sequence:UniProtKB:O33840	Pullulanase
5	bin_126_contig00007:30738-31163	6.81	6.63	6.61	6.33	renamed_bin_126_00411	renamed_bin_126	GO:0003735|GO:0005840|GO:0006412		rplK	ab initio prediction:Prodigal:2.6,similar to AA sequence:UniProtKB:Q06796	50S ribosomal protein L11
6	bin_108_contig00008:66395-66592	5.57	5.82	7.24	7.75	renamed_bin_108_00643	renamed_bin_108	GO:0003676		cspB_2	ab initio prediction:Prodigal:2.6,similar to AA sequence:UniProtKB:P41016	Cold shock protein CspB
7	bin_42_contig00016:915-1688	7.12	5.82	6.82	6.62	renamed_bin_42_01240	renamed_bin_42	GO:0005198|GO:0009420|GO:0071973		hag	ab initio prediction:Prodigal:2.6,similar to AA sequence:UniProtKB:Q05203	Flagellin
8	bin_26_contig00001:206701-207009	5.98	7.85	6.12	6.44	renamed_bin_26_00198	renamed_bin_26
9	bin_13_contig00001:322926-324071	6.41	6.56	6.73	6.7	renamed_bin_13_00347	renamed_bin_13	GO:0003677|GO:0004803|GO:0006313
10	bin_26_contig00001:235058-236008	6.07	7.79	6.2	6.35	renamed_bin_26_00220	renamed_bin_26	GO:0008168	2.1.1.199	rsmH_1	ab initio prediction:Prodigal:2.6,similar to AA sequence:UniProtKB:P60392	Ribosomal RNA small subunit methyltransferase H
11	bin_51_contig00032:10042-10845	7.22	6.3	6.74	6.15	renamed_bin_51_01339	renamed_bin_51	GO:0005215|GO:0006810		fliY	ab initio prediction:Prodigal:2.6,similar to AA sequence:UniProtKB:P0AEM9	L-cystine-binding protein FliY
12	bin_75_contig00028:23900-24751	7.18	7.15	6.22	5.88	renamed_bin_75_01466	renamed_bin_75	GO:0015948|GO:0016021|GO:0030269	2.1.1.86	mtrC	ab initio prediction:Prodigal:2.6,similar to AA sequence:UniProtKB:P80185	Tetrahydromethanopterin S-methyltransferase subunit C
13	bin_51_contig00029:6924-8180	6.53	6.25	6.87	6.79	renamed_bin_51_01292	renamed_bin_51	GO:0005215|GO:0016020|GO:0055085		pyrP	ab initio prediction:Prodigal:2.6,similar to AA sequence:UniProtKB:P39766	Uracil permease
14	bin_68_contig00051:5483-5837	6.31	6.29	6.45	7.4	renamed_bin_68_01519	renamed_bin_68			ssrA	COORDINATES:profile:Aragorn:1.2	transfer-messenger RNA%2C SsrA
15	bin_225_contig00049:2830-3188	6.73	6.8	6.29	6.64	renamed_bin_225_00593	renamed_bin_225			ssrA	COORDINATES:profile:Aragorn:1.2	transfer-messenger RNA%2C SsrA
16	bin_20_contig00003:60410-60643	6.3	6.42	7.29	6.46	renamed_bin_20_00503	renamed_bin_20
17	bin_51_contig00009:44264-44539	6.88	6.81	6.66	6.12	renamed_bin_51_00746	renamed_bin_51	GO:0042710
18	bin_48_contig00058:27-2726	6.21	6.01	7.2	7.05	renamed_bin_48_02067	renamed_bin_48
19	bin_40_contig00009:60271-60621	6.34	6.54	6.63	6.98	renamed_bin_40_00902	renamed_bin_40			ssrA	COORDINATES:profile:Aragorn:1.2	transfer-messenger RNA%2C SsrA
20	bin_126_contig00013:20149-21285	6.62	6.59	6.71	6.59	renamed_bin_126_00625	renamed_bin_126	GO:0006865
21	bin_48_contig00016:77-241	6.75	6.5	6.73	6.53	renamed_bin_48_01322	renamed_bin_48
22	bin_139_contig00024:10705-11766	5.87	6.21	7.19	7.25	renamed_bin_139_00763	renamed_bin_139	GO:0008152|GO:0008410	2.8.3.6	catI_2	ab initio prediction:Prodigal:2.6,similar to AA sequence:UniProtKB:Q8VPF3	3-oxoadipate CoA-transferase subunit A
23	bin_20_contig00009:61573-61875	6.5	5.99	7.43	6.6	renamed_bin_20_01195	renamed_bin_20	GO:0034220		atpF	ab initio prediction:Prodigal:2.6,similar to AA sequence:UniProtKB:Q60185	V-type ATP synthase subunit F
24	bin_75_contig00024:29133-29741	7.42	7.18	6.14	5.78	renamed_bin_75_01359	renamed_bin_75	GO:0003677
25	bin_49_contig00010:84451-84948	6.21	6.47	7.23	6.61	renamed_bin_49_01333	renamed_bin_49			carD_4	ab initio prediction:Prodigal:2.6,similar to AA sequence:UniProtKB:A0R561	RNA polymerase-binding transcription factor CarD
26	bin_49_contig00020:40456-41619	7.53	6.51	6.27	6.22	renamed_bin_49_01960	renamed_bin_49	GO:0006865		braC_2	ab initio prediction:Prodigal:2.6,similar to AA sequence:UniProtKB:P21175	Leucine-%2C isoleucine-%2C valine-%2C threonine-%2C and alanine-binding protein
27	bin_126_contig00036:7730-8845	6.82	6.53	6.66	6.52	renamed_bin_126_01094	renamed_bin_126			nlpD	ab initio prediction:Prodigal:2.6,similar to AA sequence:UniProtKB:P39700	Murein hydrolase activator NlpD
28	bin_126_contig00007:26936-27589	6.84	6.59	6.66	6.47	renamed_bin_126_00402	renamed_bin_126	GO:0006355		sigH	ab initio prediction:Prodigal:2.6,similar to AA sequence:UniProtKB:P17869	RNA polymerase sigma-H factor
29	bin_20_contig00005:105943-106368	6.56	6.09	7.19	6.73	renamed_bin_20_00798	renamed_bin_20	GO:0015948|GO:0055114	1.12.99.-	vhcD	ab initio prediction:Prodigal:2.6,similar to AA sequence:UniProtKB:Q00405	F420-non-reducing hydrogenase vhc iron-sulfur subunit D
30	bin_122_contig00011:26632-26907	5.86	5.75	7.4	7.56	renamed_bin_122_00490	renamed_bin_122	GO:0003677		hup_2	ab initio prediction:Prodigal:2.6,similar to AA sequence:UniProtKB:P0A3H1	DNA-binding protein HU
31	bin_106_contig00006:35468-35659	7.16	6.75	6.37	6.29	renamed_bin_106_00520	renamed_bin_106	GO:0003735|GO:0005622|GO:0005840|GO:0006412		rpmB	ab initio prediction:Prodigal:2.6,similar to AA sequence:UniProtKB:P37807	50S ribosomal protein L28
32	bin_59_contig00008:97-1053	6.92	6.76	6.49	6.41	renamed_bin_59_00207	renamed_bin_59
33	bin_6_contig00001:162974-164629	6.33	6.61	6.74	6.9	renamed_bin_6_00160	renamed_bin_6	GO:0015948|GO:0050524	2.8.4.1	mcrA	ab initio prediction:Prodigal:2.6,similar to AA sequence:UniProtKB:P11558	Methyl-coenzyme M reductase I subunit alpha
34	bin_106_contig00014:113-1432	6.98	6.45	6.69	6.47	renamed_bin_106_00928	renamed_bin_106	GO:0005215|GO:0006810
35	bin_2_contig00032:9461-9784	7.03	6.46	6.45	6.67	renamed_bin_2_02220	renamed_bin_2
36	bin_75_contig00001:67386-69374	7.33	7.19	6.33	5.78	renamed_bin_75_00072	renamed_bin_75	GO:0015078|GO:0015991|GO:0033179
37	bin_62_contig00003:20183-20359	6.82	7.3	6.72	5.81	renamed_bin_62_00340	renamed_bin_62	GO:0003735|GO:0005840|GO:0006412		rpsU	ab initio prediction:Prodigal:2.6,similar to AA sequence:UniProtKB:P66521	30S ribosomal protein S21
38	bin_168_contig00035:16444-16767	6.18	6.63	6.51	7.36	renamed_bin_168_00896	renamed_bin_168
39	bin_75_contig00014:42721-42873	7.23	6.94	6.75	5.76	renamed_bin_75_00971	renamed_bin_75	GO:0003735|GO:0005622|GO:0005840|GO:0006412
40	bin_23_contig00015:49-981	6.88	6.36	6.81	6.65	renamed_bin_23_01646	renamed_bin_23	GO:0004872|GO:0006810|GO:0016020
41	bin_75_contig00006:59622-60809	7.16	6.91	6.78	5.87	renamed_bin_75_00519	renamed_bin_75	GO:0000015|GO:0000287|GO:0004634|GO:0006096	4.2.1.11	eno	ab initio prediction:Prodigal:2.6,similar to AA sequence:UniProtKB:Q60173	Enolase
42	bin_13_contig00009:31714-32142	6.65	6.8	6.53	6.74	renamed_bin_13_01051	renamed_bin_13
43	bin_126_contig00048:96-512	6.98	6.96	6.44	6.36	renamed_bin_126_01196	renamed_bin_126
44	bin_106_contig00011:8343-9059	7.33	6.84	6.42	6.16	renamed_bin_106_00808	renamed_bin_106
45	bin_49_contig00041:1629-1997	5.8	6.17	7.63	7.16	renamed_bin_49_02217	renamed_bin_49
46	bin_126_contig00020:6906-7325	6.83	6.78	6.61	6.54	renamed_bin_126_00801	renamed_bin_126	GO:0005216|GO:0006810|GO:0016021		mscL	ab initio prediction:Prodigal:2.6,similar to AA sequence:UniProtKB:P0A742	Large-conductance mechanosensitive channel
47	bin_75_contig00003:21703-22827	6.82	6.59	6.91	6.44	renamed_bin_75_00265	renamed_bin_75	GO:0005525		ftsZ1_2	ab initio prediction:Prodigal:2.6,similar to AA sequence:UniProtKB:Q57816	Cell division protein FtsZ 1
48	bin_48_contig00044:2820-3128	5.96	6.11	7.56	7.14	renamed_bin_48_02012	renamed_bin_48
49	bin_126_contig00005:44780-45046	7.16	7.06	6.18	6.38	renamed_bin_126_00326	renamed_bin_126	GO:0006355		ndoAI_1	ab initio prediction:Prodigal:2.6,similar to AA sequence:UniProtKB:P96621	Antitoxin EndoAI
50	bin_126_contig00010:37079-37154	7.14	7.09	6.27	6.29	renamed_bin_126_00527	renamed_bin_126
51	bin_26_contig00001:76145-78262	6.22	8.02	6.2	6.36	renamed_bin_26_00075	renamed_bin_26	GO:0005524		clpB	ab initio prediction:Prodigal:2.6,similar to AA sequence:UniProtKB:O68185	Chaperone protein ClpB
52	bin_7_contig00011:8798-10012	7.18	7.11	6.67	5.84	renamed_bin_7_01346	renamed_bin_7	GO:0009055|GO:0010181	1.-.-.-	fprA_2	ab initio prediction:Prodigal:2.6,similar to AA sequence:UniProtKB:Q50497	Type A flavoprotein FprA
53	bin_126_contig00005:24796-25242	6.72	6.69	6.83	6.57	renamed_bin_126_00305	renamed_bin_126	GO:0003700|GO:0006355		fur	ab initio prediction:Prodigal:2.6,similar to AA sequence:UniProtKB:P54574	Ferric uptake regulation protein
54	bin_54_contig00006:25739-26410	6.98	6.72	6.89	6.23	renamed_bin_54_00719	renamed_bin_54	GO:0004127|GO:0005524|GO:0006139	2.7.4.25	cmk_2	ab initio prediction:Prodigal:2.6,similar to AA sequence:UniProtKB:P38493	Cytidylate kinase
55	bin_202_contig00044:1070-1615	6.48	7.79	6.31	6.25	renamed_bin_202_00629	renamed_bin_202
56	bin_11_contig00011:29972-30589	6.49	6.79	6.66	6.89	renamed_bin_11_01577	renamed_bin_11	GO:0010181	1.6.5.2		ab initio prediction:Prodigal:2.6,similar to AA sequence:UniProtKB:Q9RYU4	NAD(P)H dehydrogenase (quinone)
57	bin_51_contig00001:10074-10835	6.66	6.54	6.77	6.87	renamed_bin_51_00013	renamed_bin_51	GO:0004127|GO:0005524|GO:0006139	2.7.4.25	cmk	ab initio prediction:Prodigal:2.6,similar to AA sequence:UniProtKB:P0A6I0	Cytidylate kinase
58	bin_51_contig00002:38810-39073	6.73	6.23	7.15	6.73	renamed_bin_51_00231	renamed_bin_51			acpP	ab initio prediction:Prodigal:2.6,protein motif:HAMAP:MF_01217	Acyl carrier protein
59	bin_51_contig00001:127708-127968	6.71	6.29	7.11	6.76	renamed_bin_51_00123	renamed_bin_51			spoVS_1	ab initio prediction:Prodigal:2.6,similar to AA sequence:UniProtKB:P45693	Stage V sporulation protein S
60	bin_56_contig00013:17993-18268	5.14	6.14	7.93	7.67	renamed_bin_56_01549	renamed_bin_56	GO:0042710
61	bin_75_contig00028:11961-12386	7.27	7.24	6.39	5.98	renamed_bin_75_01454	renamed_bin_75	GO:0015948|GO:0055114	1.12.99.-	vhcD	ab initio prediction:Prodigal:2.6,similar to AA sequence:UniProtKB:Q00405	F420-non-reducing hydrogenase vhc iron-sulfur subunit D
62	bin_211_contig00054:5666-5821	6.66	6.63	6.42	7.17	renamed_bin_211_01034	renamed_bin_211
63	bin_415_contig00013:8436-8828	6.52	7.82	6.85	5.7	renamed_bin_415_00190	renamed_bin_415
64	bin_126_contig00007:18787-19842	6.96	6.78	6.61	6.54	renamed_bin_126_00393	renamed_bin_126		2.7.7.85	disA	ab initio prediction:Prodigal:2.6,similar to AA sequence:UniProtKB:P37573	DNA integrity scanning protein DisA
65	bin_26_contig00001:138504-139619	6.56	7.9	6.26	6.18	renamed_bin_26_00132	renamed_bin_26	GO:0005524|GO:0006457|GO:0009408|GO:0051082		dnaJ	ab initio prediction:Prodigal:2.6,similar to AA sequence:UniProtKB:Q05646	Chaperone protein DnaJ
66	bin_126_contig00038:1105-1716	6.99	6.6	6.76	6.55	renamed_bin_126_01111	renamed_bin_126	GO:0016021
67	bin_32_contig00001:153468-154133	6.71	8.35	5.84	6.01	renamed_bin_32_00151	renamed_bin_32
68	bin_167_contig00007:1262-1684	6.73	7.52	5.58	7.08	renamed_bin_167_00255	renamed_bin_167
69	bin_126_contig00006:46989-48257	6.72	6.4	6.93	6.86	renamed_bin_126_00373	renamed_bin_126			msmE_2	ab initio prediction:Prodigal:2.6,similar to AA sequence:UniProtKB:Q00749	Multiple sugar-binding protein
70	bin_151_contig00006:5386-6168	6.74	6.32	7.45	6.4	renamed_bin_151_00253	renamed_bin_151	GO:0031419|GO:0046872		mtaC_1	ab initio prediction:Prodigal:2.6,similar to AA sequence:UniProtKB:Q46EH4	Methanol--corrinoid protein
71	bin_20_contig00014:1708-2148	6.31	5.87	7.61	7.13	renamed_bin_20_01406	renamed_bin_20	GO:0003723
72	bin_126_contig00012:5051-6091	6.93	6.83	6.72	6.45	renamed_bin_126_00575	renamed_bin_126
73	bin_126_contig00007:20977-22101	6.88	6.69	6.81	6.56	renamed_bin_126_00396	renamed_bin_126		3.1.-.-	yacL	ab initio prediction:Prodigal:2.6,similar to AA sequence:UniProtKB:Q06754	putative PIN and TRAM-domain containing protein YacL
74	bin_168_contig00072:1830-2270	7.01	6.28	6.28	7.38	renamed_bin_168_01248	renamed_bin_168
75	bin_4_contig00025:3903-4163	7.26	7.45	5.99	6.27	renamed_bin_4_02108	renamed_bin_4
76	bin_126_contig00022:9497-10813	6.99	6.36	6.82	6.81	renamed_bin_126_00858	renamed_bin_126
77	bin_126_contig00038:4461-5570	6.92	6.45	6.85	6.76	renamed_bin_126_01115	renamed_bin_126	GO:0005524|GO:0016887	3.6.3.-	sugC	ab initio prediction:Prodigal:2.6,similar to AA sequence:UniProtKB:P9WQI3	Trehalose import ATP-binding protein SugC
78	bin_26_contig00002:103083-103460	6.31	8.01	6.25	6.43	renamed_bin_26_00351	renamed_bin_26	GO:0003735|GO:0005622|GO:0005840|GO:0006412		rplL	ab initio prediction:Prodigal:2.6,similar to AA sequence:UniProtKB:P0A471	50S ribosomal protein L7/L12
79	bin_126_contig00005:50777-51763	6.85	6.54	6.89	6.72	renamed_bin_126_00331	renamed_bin_126			rbsB_1	ab initio prediction:Prodigal:2.6,similar to AA sequence:UniProtKB:P44737	Ribose import binding protein RbsB
80	bin_121_contig00065:172-858	6.4	5.81	7.58	7.22	renamed_bin_121_00742	renamed_bin_121
81	bin_168_contig00016:13862-14158	6.66	6.46	6.32	7.58	renamed_bin_168_00554	renamed_bin_168	GO:0003735|GO:0005622|GO:0005840|GO:0006412		rpsP	ab initio prediction:Prodigal:2.6,similar to AA sequence:UniProtKB:P62238	30S ribosomal protein S16
82	bin_75_contig00014:36640-36933	7.2	7.11	6.67	6.04	renamed_bin_75_00962	renamed_bin_75	GO:0003735|GO:0005622|GO:0005840|GO:0006412
83	bin_141_contig00002:59646-60188	6.82	6.69	6.23	7.28	renamed_bin_141_00115	renamed_bin_141
84	bin_126_contig00032:6702-9116	6.75	6.75	6.82	6.72	renamed_bin_126_01047	renamed_bin_126	GO:0004176|GO:0004252|GO:0006508	3.4.21.53	lon1	ab initio prediction:Prodigal:2.6,similar to AA sequence:UniProtKB:P37945	Lon protease 1
85	bin_54_contig00009:46757-48199	6.58	6.74	7.25	6.48	renamed_bin_54_00970	renamed_bin_54	GO:0005524|GO:0016887	3.6.3.20	ugpC_1	ab initio prediction:Prodigal:2.6,similar to AA sequence:UniProtKB:P10907	sn-glycerol-3-phosphate import ATP-binding protein UgpC
86	bin_88_contig00077:153-464	6.63	6.03	7.27	7.18	renamed_bin_88_02050	renamed_bin_88
87	bin_51_contig00007:5212-6222	6.9	6.3	7.01	6.91	renamed_bin_51_00569	renamed_bin_51			phnS	ab initio prediction:Prodigal:2.6,similar to AA sequence:UniProtKB:P96062	Putative 2-aminoethylphosphonate-binding periplasmic protein
88	bin_51_contig00001:179389-179817	6.27	6.24	7.24	7.4	renamed_bin_51_00176	renamed_bin_51
89	bin_158_contig00090:3334-5142	7.22	7.03	6.58	6.33	renamed_bin_158_01604	renamed_bin_158
90	bin_23_contig00015:72320-72580	6.88	6.78	7.04	6.46	renamed_bin_23_01709	renamed_bin_23			spoVS_2	ab initio prediction:Prodigal:2.6,similar to AA sequence:UniProtKB:P45693	Stage V sporulation protein S
91	bin_126_contig00016:20140-21168	6.91	6.61	6.83	6.82	renamed_bin_126_00725	renamed_bin_126	GO:0005524|GO:0016887		oppF_2	ab initio prediction:Prodigal:2.6,similar to AA sequence:UniProtKB:P24137	Oligopeptide transport ATP-binding protein OppF
92	bin_598_contig00067:588-1217	7.09	6.79	6.58	6.71	renamed_bin_598_00351	renamed_bin_598
93	bin_168_contig00019:26629-26904	6.8	6.35	6.53	7.51	renamed_bin_168_00639	renamed_bin_168
94	bin_26_contig00002:128656-130197	6.75	8.28	5.62	6.56	renamed_bin_26_00368	renamed_bin_26
95	bin_168_contig00004:44941-45231	6.96	6.86	6.16	7.23	renamed_bin_168_00159	renamed_bin_168	GO:0003677
96	bin_11_contig00003:181403-183553	6.7	6.88	6.68	6.95	renamed_bin_11_00794	renamed_bin_11			slpA_2	ab initio prediction:Prodigal:2.6,similar to AA sequence:UniProtKB:Q9RRB6	S-layer protein SlpA
97	bin_51_contig00016:15711-16925	6.89	6.03	7.19	7.11	renamed_bin_51_00994	renamed_bin_51	GO:0015293|GO:0016021		gltP	ab initio prediction:Prodigal:2.6,similar to AA sequence:UniProtKB:P21345	Proton/glutamate-aspartate symporter
98	bin_106_contig00018:24168-24323	6.72	6.72	7.01	6.77	renamed_bin_106_01061	renamed_bin_106	GO:0003723|GO:0006109|GO:0006402		csrA	ab initio prediction:Prodigal:2.6,protein motif:HAMAP:MF_00167	Carbon storage regulator
99	bin_20_contig00002:4610-4870	6.96	6.43	7.25	6.59	renamed_bin_20_00295	renamed_bin_20	GO:0016625|GO:0051539		porD_2	ab initio prediction:Prodigal:2.6,similar to AA sequence:UniProtKB:Q51803	Pyruvate synthase subunit PorD
100	bin_168_contig00032:2906-4249	7.26	6.17	6.52	7.3	renamed_bin_168_00851	renamed_bin_168
101	bin_168_contig00027:16312-16851	7.1	6.54	6.44	7.17	renamed_bin_168_00775	renamed_bin_168	GO:0016209|GO:0016491|GO:0055114		resA_2	ab initio prediction:Prodigal:2.6,similar to AA sequence:UniProtKB:P35160	Thiol-disulfide oxidoreductase ResA
102	bin_62_contig00012:19971-20552	4.85	8.58	7.47	6.36	renamed_bin_62_01228	renamed_bin_62
103	bin_70_contig00007:13111-15579	7.77	4.5	8.19	6.83	renamed_bin_70_00670	renamed_bin_70
104	bin_26_contig00002:88992-89387	6.28	8.34	6.11	6.57	renamed_bin_26_00334	renamed_bin_26	GO:0003735|GO:0005840|GO:0006412		rpsK	ab initio prediction:Prodigal:2.6,similar to AA sequence:UniProtKB:Q2FW31	30S ribosomal protein S11
105	bin_250_contig00040:11747-11884	6.71	6.29	7.05	7.25	renamed_bin_250_00824	renamed_bin_250	GO:0016209|GO:0016491|GO:0055114	1.11.1.15	prxU_1	ab initio prediction:Prodigal:2.6,similar to AA sequence:UniProtKB:Q9L3Q5	Selenocysteine-containing peroxiredoxin PrxU
106	bin_168_contig00013:16083-16352	6.67	6.69	6.46	7.49	renamed_bin_168_00475	renamed_bin_168	GO:0003735|GO:0005622|GO:0005840|GO:0006412		rpsO	ab initio prediction:Prodigal:2.6,similar to AA sequence:UniProtKB:Q2G2Q1	30S ribosomal protein S15
107	bin_75_contig00028:14134-15843	7.81	7.48	6.33	5.69	renamed_bin_75_01457	renamed_bin_75	GO:0016810	3.5.2.5	allB_2	ab initio prediction:Prodigal:2.6,protein motif:HAMAP:MF_01645	Allantoinase
108	bin_47_contig00001:32063-32500	6.74	6.62	6.83	7.12	renamed_bin_47_00032	renamed_bin_47
109	bin_126_contig00027:13958-15268	6.94	6.66	6.93	6.78	renamed_bin_126_00970	renamed_bin_126	GO:0005215|GO:0006810		lacE	ab initio prediction:Prodigal:2.6,similar to AA sequence:UniProtKB:P29822	Lactose-binding protein
110	bin_23_contig00002:175605-175892	6.95	6.71	7.02	6.65	renamed_bin_23_00444	renamed_bin_23	GO:0003677		hup	ab initio prediction:Prodigal:2.6,similar to AA sequence:UniProtKB:P0A3H1	DNA-binding protein HU
111	bin_26_contig00003:17564-18148	6.74	8.09	5.93	6.58	renamed_bin_26_00404	renamed_bin_26	GO:0016787	3.6.1.9		ab initio prediction:Prodigal:2.6,similar to AA sequence:UniProtKB:P99094	Non-canonical purine NTP pyrophosphatase
112	bin_158_contig00019:9054-9239	5.63	7.13	7.19	7.39	renamed_bin_158_00680	renamed_bin_158
113	bin_75_contig00006:44118-44492	7.23	6.79	7.05	6.28	renamed_bin_75_00497	renamed_bin_75
114	bin_51_contig00008:21737-22045	7.86	6.78	6.58	6.14	renamed_bin_51_00646	renamed_bin_51	GO:0003735|GO:0005840|GO:0006412		rpsJ	ab initio prediction:Prodigal:2.6,similar to AA sequence:UniProtKB:P21471	30S ribosomal protein S10
115	bin_20_contig00008:11777-12082	6.25	6.55	7.62	6.95	renamed_bin_20_01034	renamed_bin_20	GO:0003743|GO:0006413
116	bin_20_contig00008:87598-87876	6.68	6.14	7.7	6.87	renamed_bin_20_01112	renamed_bin_20	GO:0003735|GO:0005622|GO:0005840|GO:0006412
117	bin_106_contig00016:17427-18734	6.99	6.65	6.89	6.9	renamed_bin_106_01002	renamed_bin_106	GO:0005215|GO:0006810
118	bin_106_contig00004:89894-90310	6.99	7.06	6.86	6.55	renamed_bin_106_00405	renamed_bin_106
119	bin_54_contig00004:31557-34097	7.44	6.99	6.7	6.34	renamed_bin_54_00550	renamed_bin_54
120	bin_141_contig00030:128-634	6.26	6.8	6.91	7.53	renamed_bin_141_00801	renamed_bin_141
121	bin_168_contig00015:34-1272	6.81	6.35	6.73	7.62	renamed_bin_168_00513	renamed_bin_168
122	bin_11_contig00002:152106-153410	6.95	6.98	6.71	6.89	renamed_bin_11_00508	renamed_bin_11	GO:0005215|GO:0006810
123	bin_126_contig00064:123-518	7.35	7.07	6.49	6.63	renamed_bin_126_01284	renamed_bin_126
124	bin_13_contig00008:211-408	6.74	6.95	7.02	6.85	renamed_bin_13_00947	renamed_bin_13	GO:0003677|GO:0006355		cspB	ab initio prediction:Prodigal:2.6,similar to AA sequence:UniProtKB:P41016	Cold shock protein CspB
125	bin_54_contig00001:140354-140758	7.66	7.27	6.34	6.3	renamed_bin_54_00130	renamed_bin_54
126	bin_36_contig00011:17611-19032	7.02	6.98	6.72	6.85	renamed_bin_36_00909	renamed_bin_36	GO:0005215|GO:0006810
127	bin_32_contig00001:219159-219234	6.39	8.79	6.11	6.29	renamed_bin_32_00216	renamed_bin_32
128	bin_11_contig00001:27879-28229	7.34	7.09	6.55	6.64	renamed_bin_11_00026	renamed_bin_11
129	bin_6_contig00001:165992-166426	6.53	6.72	7.13	7.24	renamed_bin_6_00163	renamed_bin_6	GO:0015948		mcrD	ab initio prediction:Prodigal:2.6,similar to AA sequence:UniProtKB:P11564	Methyl-coenzyme M reductase I operon protein D
130	bin_20_contig00001:136594-136800	6.3	6.49	7.67	7.17	renamed_bin_20_00138	renamed_bin_20	GO:0046982		han1A	ab initio prediction:Prodigal:2.6,similar to AA sequence:UniProtKB:P95669	Archaeal histone HAN1 subunit A
131	bin_106_contig00007:16390-17274	7.19	6.89	6.82	6.73	renamed_bin_106_00576	renamed_bin_106	GO:0003677		noc	ab initio prediction:Prodigal:2.6,similar to AA sequence:UniProtKB:P37524	Nucleoid occlusion protein
132	bin_75_contig00028:22143-23051	7.61	7.5	6.49	6.04	renamed_bin_75_01464	renamed_bin_75	GO:0005737|GO:0006814|GO:0012506|GO:0030269	2.1.1.86	mtrE	ab initio prediction:Prodigal:2.6,similar to AA sequence:UniProtKB:P80651	Tetrahydromethanopterin S-methyltransferase subunit E
133	bin_20_contig00005:102428-103009	6.9	6.28	7.55	6.98	renamed_bin_20_00795	renamed_bin_20	GO:0015948|GO:0051186|GO:0051539|GO:0051912|GO:0055114	1.8.98.1	hdrC	ab initio prediction:Prodigal:2.6,similar to AA sequence:UniProtKB:Q50754	CoB--CoM heterodisulfide reductase iron-sulfur subunit C
134	bin_106_contig00011:36624-36827	7.15	6.95	6.97	6.64	renamed_bin_106_00834	renamed_bin_106	GO:0005886|GO:0008565|GO:0009306|GO:0015031|GO:0016021		tatAd	ab initio prediction:Prodigal:2.6,similar to AA sequence:UniProtKB:O31467	Sec-independent protein translocase protein TatAd
135	bin_51_contig00006:46-231	6.91	6.36	7.37	7.07	renamed_bin_51_00515	renamed_bin_51
136	bin_26_contig00002:130211-131410	6.73	8.33	5.96	6.75	renamed_bin_26_00369	renamed_bin_26
137	bin_126_contig00023:6379-6768	7.16	7.07	6.71	6.84	renamed_bin_126_00877	renamed_bin_126	GO:0005506|GO:0016491|GO:0055114	1.15.1.2		ab initio prediction:Prodigal:2.6,similar to AA sequence:UniProtKB:Q9WZC6	Putative superoxide reductase
138	bin_75_contig00043:3856-4161	7.46	7.53	6.71	6.09	renamed_bin_75_01786	renamed_bin_75	GO:0003743|GO:0006413
139	bin_51_contig00003:54377-56182	7.18	6.88	6.92	6.82	renamed_bin_51_00359	renamed_bin_51	GO:0016491|GO:0016625|GO:0051536|GO:0055114	1.-.-.-	ydhV_1	ab initio prediction:Prodigal:2.6,similar to AA sequence:UniProtKB:P76192	putative oxidoreductase YdhV
140	bin_747_contig00037:82-1233	7	6.81	7.05	6.94	renamed_bin_747_00166	renamed_bin_747
141	bin_66_contig00008:42760-42939	7.22	6.56	6.94	7.12	renamed_bin_66_00828	renamed_bin_66	GO:0003690|GO:0006265		sspC2_2	ab initio prediction:Prodigal:2.6,similar to AA sequence:UniProtKB:P21887	Small%2C acid-soluble spore protein C2
142	bin_168_contig00032:4254-4694	7.19	6.49	6.71	7.46	renamed_bin_168_00852	renamed_bin_168			hspA	ab initio prediction:Prodigal:2.6,similar to AA sequence:UniProtKB:Q06823	Spore protein SP21
143	bin_62_contig00034:7715-9403	5.41	10.2	6.99	5.26	renamed_bin_62_02204	renamed_bin_62	GO:0030246
144	bin_108_contig00014:7586-9796	5.5	4.95	8.61	8.81	renamed_bin_108_00940	renamed_bin_108
145	bin_93_contig00001:102461-102769	6.14	7.33	7.03	7.38	renamed_bin_93_00088	renamed_bin_93	GO:0030699|GO:0030700|GO:0050485|GO:0055114	1.21.4.2	grdA1_1	ab initio prediction:Prodigal:2.6,similar to AA sequence:UniProtKB:P50972	Glycine/sarcosine/betaine reductase complex component A1
146	bin_31_contig00029:18980-19330	6.72	6.29	7.34	7.53	renamed_bin_31_02093	renamed_bin_31			ssrA	COORDINATES:profile:Aragorn:1.2	transfer-messenger RNA%2C SsrA
147	bin_13_contig00001:140221-140541	6.96	6.71	6.93	7.3	renamed_bin_13_00146	renamed_bin_13	GO:0045454		trxA_1	ab initio prediction:Prodigal:2.6,similar to AA sequence:UniProtKB:Q2FZD2	Thioredoxin
148	bin_96_contig00003:96320-96748	6.8	5.92	7.73	7.46	renamed_bin_96_00306	renamed_bin_96	GO:0003700|GO:0006355		mhqR	ab initio prediction:Prodigal:2.6,similar to AA sequence:UniProtKB:O31672	HTH-type transcriptional regulator MhqR
149	bin_101_contig00035:16886-17259	5.72	6.32	7.68	8.2	renamed_bin_101_01438	renamed_bin_101			ssrA	COORDINATES:profile:Aragorn:1.2	transfer-messenger RNA%2C SsrA
150	bin_74_contig00014:45069-45421	6.42	6.43	7.84	7.24	renamed_bin_74_01307	renamed_bin_74			ssrA	COORDINATES:profile:Aragorn:1.2	transfer-messenger RNA%2C SsrA
151	bin_26_contig00001:45720-45833	6.67	8.15	6.45	6.68	renamed_bin_26_00049	renamed_bin_26
152	bin_96_contig00009:32995-34491	6.71	6.39	7.53	7.32	renamed_bin_96_00729	renamed_bin_96	GO:0005975|GO:0016773	2.7.1.30	glpK	ab initio prediction:Prodigal:2.6,similar to AA sequence:UniProtKB:P18157	Glycerol kinase
153	bin_282_contig00017:5793-6470	6.82	6.4	8.42	6.32	renamed_bin_282_00343	renamed_bin_282	GO:0051920|GO:0055114	1.11.1.15	ahpC	ab initio prediction:Prodigal:2.6,similar to AA sequence:UniProtKB:P9WQB7	Alkyl hydroperoxide reductase subunit C
154	bin_168_contig00019:27979-28506	6.98	6.47	6.73	7.8	renamed_bin_168_00641	renamed_bin_168
155	bin_168_contig00015:28224-28736	7.17	6.36	6.8	7.66	renamed_bin_168_00534	renamed_bin_168
156	bin_54_contig00014:38344-39609	7.77	7.25	6.42	6.56	renamed_bin_54_01234	renamed_bin_54	GO:0005524|GO:0016887	3.6.3.20	ugpC_2	ab initio prediction:Prodigal:2.6,similar to AA sequence:UniProtKB:P10907	sn-glycerol-3-phosphate import ATP-binding protein UgpC
157	bin_54_contig00005:43129-43794	7.36	7.36	6.73	6.59	renamed_bin_54_00652	renamed_bin_54
158	bin_51_contig00001:57012-57482	7.08	6.82	7.01	7.14	renamed_bin_51_00055	renamed_bin_51		3.5.1.88	def	ab initio prediction:Prodigal:2.6,similar to AA sequence:UniProtKB:P96113	Peptide deformylase
159	bin_106_contig00014:18331-18510	7.15	7.03	7.1	6.78	renamed_bin_106_00940	renamed_bin_106	GO:0006355|GO:0009289
160	bin_96_contig00022:4927-5958	6.21	5.5	8.17	8.21	renamed_bin_96_01219	renamed_bin_96			rbsB	ab initio prediction:Prodigal:2.6,similar to AA sequence:UniProtKB:P44737	Ribose import binding protein RbsB
161	bin_126_contig00040:6521-8725	7.14	6.53	7.4	7.04	renamed_bin_126_01138	renamed_bin_126	GO:0004252|GO:0006508	3.4.21.-		ab initio prediction:Prodigal:2.6,similar to AA sequence:UniProtKB:Q45670	Thermophilic serine proteinase
162	bin_106_contig00017:247-678	6.96	7.1	7.13	6.94	renamed_bin_106_01012	renamed_bin_106	GO:0003700|GO:0006355		mraZ	ab initio prediction:Prodigal:2.6,similar to AA sequence:UniProtKB:P65439	Transcriptional regulator MraZ
163	bin_98_contig00001:91559-92728	7.33	6.5	6.98	7.32	renamed_bin_98_00080	renamed_bin_98
164	bin_7_contig00016:7164-7811	7.49	7.25	6.96	6.44	renamed_bin_7_01611	renamed_bin_7	GO:0043571
165	bin_108_contig00008:47835-48161	7.14	5.99	7.59	7.44	renamed_bin_108_00619	renamed_bin_108
166	bin_282_contig00011:19941-20285	7.59	7.27	6.88	6.44	renamed_bin_282_00251	renamed_bin_282
167	bin_26_contig00002:101287-101700	6.55	8.28	6.65	6.71	renamed_bin_26_00348	renamed_bin_26	GO:0003735|GO:0005840|GO:0006412		rplK	ab initio prediction:Prodigal:2.6,similar to AA sequence:UniProtKB:P29395	50S ribosomal protein L11
168	bin_2_contig00007:92544-92738	7.96	7.67	4.96	7.63	renamed_bin_2_01329	renamed_bin_2
169	bin_2_contig00001:262417-262689	7.18	6.42	7.5	7.12	renamed_bin_2_00243	renamed_bin_2
170	bin_51_contig00003:53895-54377	7.3	6.94	7.07	6.94	renamed_bin_51_00358	renamed_bin_51			dmsB	ab initio prediction:Prodigal:2.6,similar to AA sequence:UniProtKB:P18776	Anaerobic dimethyl sulfoxide reductase chain B
171	bin_384_contig00077:2138-2536	7.2	7.56	6.83	6.67	renamed_bin_384_00692	renamed_bin_384
172	bin_75_contig00003:39287-40525	7.14	7.09	7.32	6.77	renamed_bin_75_00284	renamed_bin_75	GO:0051536	1.2.1.2	fdhB_2	ab initio prediction:Prodigal:2.6,similar to AA sequence:UniProtKB:P06130	Formate dehydrogenase subunit beta
173	bin_126_contig00014:13380-15263	7.37	6.71	7.25	7	renamed_bin_126_00652	renamed_bin_126	GO:0043190|GO:0055085		appA_2	ab initio prediction:Prodigal:2.6,similar to AA sequence:UniProtKB:P42061	Oligopeptide-binding protein AppA
174	bin_99_contig00004:21393-21665	6.81	6.83	7.51	7.23	renamed_bin_99_00308	renamed_bin_99
175	bin_384_contig00039:1421-4300	7.01	7.24	7.01	7.14	renamed_bin_384_00520	renamed_bin_384
176	bin_11_contig00005:116597-117067	7.19	7.08	6.94	7.19	renamed_bin_11_01096	renamed_bin_11	GO:0016722|GO:0055114	1.16.-.-	dps2	ab initio prediction:Prodigal:2.6,similar to AA sequence:UniProtKB:Q8RPQ2	DNA protection during starvation protein 2
177	bin_6_contig00001:165393-165989	6.8	6.97	7.29	7.41	renamed_bin_6_00162	renamed_bin_6			mcrC	ab initio prediction:Prodigal:2.6,similar to AA sequence:UniProtKB:O27234	Methyl-coenzyme M reductase I operon protein C
178	bin_75_contig00002:46622-47329	7.58	7.75	6.86	6.28	renamed_bin_75_00216	renamed_bin_75	GO:0005198|GO:0006928
179	bin_70_contig00030:35-2737	7.07	6.79	7.59	7.07	renamed_bin_70_01159	renamed_bin_70
180	bin_54_contig00004:59643-60059	7.42	7.43	6.94	6.74	renamed_bin_54_00570	renamed_bin_54
181	bin_11_contig00007:80530-81507	7.34	7.36	6.8	7.03	renamed_bin_11_01311	renamed_bin_11			ytfQ	ab initio prediction:Prodigal:2.6,similar to AA sequence:UniProtKB:P39325	ABC transporter periplasmic-binding protein YtfQ
182	bin_75_contig00057:6371-6652	7.7	7.54	6.99	6.31	renamed_bin_75_02002	renamed_bin_75
183	bin_83_contig00021:17408-17768	5.94	7.14	8.02	7.45	renamed_bin_83_01326	renamed_bin_83			ssrA	COORDINATES:profile:Aragorn:1.2	transfer-messenger RNA%2C SsrA
184	bin_282_contig00002:1649-1792	6.4	6.22	9.5	6.46	renamed_bin_282_00034	renamed_bin_282
185	bin_126_contig00058:3417-4058	7.19	7.2	7.23	6.96	renamed_bin_126_01265	renamed_bin_126
186	bin_20_contig00005:101245-102417	7	6.61	7.73	7.25	renamed_bin_20_00794	renamed_bin_20			mvhB_2	ab initio prediction:Prodigal:2.6,similar to AA sequence:UniProtKB:P60232	Polyferredoxin protein MvhB
187	bin_63_contig00049:7427-7609	6.96	7.36	6.93	7.35	renamed_bin_63_02533	renamed_bin_63
188	bin_106_contig00008:67776-68519	7.14	7.2	7.2	7.07	renamed_bin_106_00702	renamed_bin_106	GO:0003677|GO:0005525		codY	ab initio prediction:Prodigal:2.6,similar to AA sequence:UniProtKB:P39779	GTP-sensing transcriptional pleiotropic repressor CodY
189	bin_168_contig00053:7046-7402	6.83	6.45	7.13	8.24	renamed_bin_168_01088	renamed_bin_168
190	bin_75_contig00007:19953-20384	7.57	7.54	7.09	6.45	renamed_bin_75_00550	renamed_bin_75
191	bin_75_contig00028:25805-26842	7.87	7.79	6.73	6.27	renamed_bin_75_01469	renamed_bin_75	GO:0006730|GO:0008168	2.1.1.86	mtrH	ab initio prediction:Prodigal:2.6,similar to AA sequence:UniProtKB:P80650	Tetrahydromethanopterin S-methyltransferase subunit H
192	bin_54_contig00016:34487-37339	7.82	7.12	6.93	6.81	renamed_bin_54_01287	renamed_bin_54
193	bin_96_contig00015:41868-42284	7.14	6.56	7.99	7.03	renamed_bin_96_01040	renamed_bin_96	GO:0006950|GO:0055114		tpf1	ab initio prediction:Prodigal:2.6,similar to AA sequence:UniProtKB:P16665	Antigen TpF1
194	bin_7_contig00002:50148-51386	6.95	6.61	7.93	7.24	renamed_bin_7_00486	renamed_bin_7	GO:0051536	1.2.1.2	fdhB_1	ab initio prediction:Prodigal:2.6,similar to AA sequence:UniProtKB:P06130	Formate dehydrogenase subunit beta
195	bin_20_contig00002:63686-64546	7.11	6.66	7.74	7.24	renamed_bin_20_00364	renamed_bin_20
196	bin_32_contig00001:33856-35157	6.8	8.31	7.14	6.5	renamed_bin_32_00030	renamed_bin_32
197	bin_48_contig00004:50371-50784	6.66	6.48	7.87	7.74	renamed_bin_48_00534	renamed_bin_48
198	bin_75_contig00006:59341-59415	7.9	7.28	7.23	6.34	renamed_bin_75_00517	renamed_bin_75
199	bin_36_contig00037:338-1099	7.05	7.33	7.33	7.1	renamed_bin_36_01288	renamed_bin_36	GO:0005198|GO:0071973		hag_3	ab initio prediction:Prodigal:2.6,similar to AA sequence:UniProtKB:Q05203	Flagellin
200	bin_106_contig00008:68728-69240	7.51	7	7.18	7.12	renamed_bin_106_00703	renamed_bin_106	GO:0006826|GO:0006879|GO:0008199	1.16.3.1	bfr	ab initio prediction:Prodigal:2.6,similar to AA sequence:UniProtKB:Q93PP9	Bacterioferritin
201	bin_51_contig00022:20662-21699	7	6.95	7.52	7.34	renamed_bin_51_01171	renamed_bin_51	GO:0004124|GO:0006535	2.5.1.47	cysK	ab initio prediction:Prodigal:2.6,similar to AA sequence:UniProtKB:P63871	Cysteine synthase
202	bin_75_contig00036:14212-14421	7.57	7.57	7.1	6.63	renamed_bin_75_01637	renamed_bin_75	GO:0006810|GO:0030151
203	bin_168_contig00058:3620-4168	7.03	7.05	6.96	7.85	renamed_bin_168_01134	renamed_bin_168
204	bin_3_contig00002:204478-204858	7.27	6.8	7.14	7.68	renamed_bin_3_00683	renamed_bin_3			ssrA	COORDINATES:profile:Aragorn:1.2	transfer-messenger RNA%2C SsrA
205	bin_168_contig00007:16123-16935	8.04	7.02	6.64	7.21	renamed_bin_168_00261	renamed_bin_168	GO:0005524		apbC	ab initio prediction:Prodigal:2.6,similar to AA sequence:UniProtKB:Q8ZNN5	Iron-sulfur cluster carrier protein
206	bin_764_contig00008:3348-3569	7.11	7.07	7.18	7.56	renamed_bin_764_00075	renamed_bin_764
207	bin_99_contig00004:21052-21360	7.08	7	7.65	7.23	renamed_bin_99_00307	renamed_bin_99	GO:0003676
208	bin_20_contig00012:31-1548	6.98	6.42	8.1	7.47	renamed_bin_20_01333	renamed_bin_20
209	bin_106_contig00006:16011-16889	7.48	7.14	7.27	7.08	renamed_bin_106_00496	renamed_bin_106
210	bin_62_contig00008:81442-82794	5.94	8.28	7.43	7.41	renamed_bin_62_00964	renamed_bin_62
211	bin_26_contig00001:136612-138441	7.08	8.38	6.82	6.8	renamed_bin_26_00131	renamed_bin_26	GO:0005524|GO:0006457|GO:0051082		dnaK	ab initio prediction:Prodigal:2.6,similar to AA sequence:UniProtKB:Q5KWZ7	Chaperone protein DnaK
212	bin_126_contig00048:6540-7172	7.25	7	7.59	7.25	renamed_bin_126_01203	renamed_bin_126
213	bin_397_contig00103:104-349	6.58	6.52	8.11	7.9	renamed_bin_397_00679	renamed_bin_397		1.-.-.-	roo	ab initio prediction:Prodigal:2.6,similar to AA sequence:UniProtKB:Q9F0J6	Rubredoxin-oxygen oxidoreductase
214	bin_75_contig00001:99696-99923	7.92	7.74	7.14	6.31	renamed_bin_75_00110	renamed_bin_75
215	bin_51_contig00004:19331-20665	7.31	6.9	7.56	7.41	renamed_bin_51_00390	renamed_bin_51	GO:0005215|GO:0006810|GO:0016020|GO:0055085		pbuG	ab initio prediction:Prodigal:2.6,similar to AA sequence:UniProtKB:O34987	Guanine/hypoxanthine permease PbuG
216	bin_33_contig00019:11084-11356	7.13	6.81	7.68	7.62	renamed_bin_33_01802	renamed_bin_33	GO:0003677		hupB	ab initio prediction:Prodigal:2.6,similar to AA sequence:UniProtKB:P0ACF4	DNA-binding protein HU-beta
217	bin_75_contig00006:59447-59614	7.67	7.14	7.72	6.74	renamed_bin_75_00518	renamed_bin_75	GO:0003677|GO:0003899|GO:0006351	2.7.7.6	rpoK	ab initio prediction:Prodigal:2.6,similar to AA sequence:UniProtKB:Q5JJD0	DNA-directed RNA polymerase subunit K
218	bin_51_contig00026:3275-4759	7.3	7.33	7.38	7.26	renamed_bin_51_01232	renamed_bin_51	GO:0003824|GO:0055114	1.1.1.205	guaB	ab initio prediction:Prodigal:2.6,similar to AA sequence:UniProtKB:P21879	Inosine-5'-monophosphate dehydrogenase
219	bin_106_contig00007:30347-30733	7.5	7.44	7.17	7.18	renamed_bin_106_00592	renamed_bin_106	GO:0003735|GO:0005840|GO:0006412|GO:0019843		rpsF	ab initio prediction:Prodigal:2.6,similar to AA sequence:UniProtKB:P9WH31	30S ribosomal protein S6
220	bin_75_contig00003:20475-21335	8.23	7.85	6.87	6.37	renamed_bin_75_00264	renamed_bin_75
221	bin_51_contig00033:4379-4609	7.4	6.89	7.64	7.39	renamed_bin_51_01350	renamed_bin_51	GO:0003677
222	bin_20_contig00005:103014-103910	7.25	6.75	7.87	7.47	renamed_bin_20_00796	renamed_bin_20	GO:0015948|GO:0051186|GO:0051912|GO:0055114	1.8.98.1	hdrB	ab initio prediction:Prodigal:2.6,similar to AA sequence:UniProtKB:Q50755	CoB--CoM heterodisulfide reductase subunit B
223	bin_106_contig00016:26373-27983	7.43	6.97	7.48	7.46	renamed_bin_106_01008	renamed_bin_106			lipO	ab initio prediction:Prodigal:2.6,similar to AA sequence:UniProtKB:P37966	Lipoprotein LipO
224	bin_70_contig00006:45083-46738	9.12	5.43	7.69	7.11	renamed_bin_70_00627	renamed_bin_70
225	bin_75_contig00022:26994-27398	7.64	7.83	7.11	6.79	renamed_bin_75_01290	renamed_bin_75	GO:0004733|GO:0010181|GO:0055114
226	bin_168_contig00004:38707-38955	7.56	7.27	6.71	7.84	renamed_bin_168_00155	renamed_bin_168
227	bin_75_contig00007:25064-26341	8.37	8.06	6.84	6.12	renamed_bin_75_00556	renamed_bin_75	GO:0003746|GO:0005525|GO:0005737|GO:0006414		tuf_1	ab initio prediction:Prodigal:2.6,similar to AA sequence:UniProtKB:O27132	Elongation factor 1-alpha
228	bin_20_contig00014:21880-22470	7.26	6.61	8.02	7.51	renamed_bin_20_01426	renamed_bin_20
229	bin_99_contig00001:85099-85632	7.42	7.08	7.57	7.33	renamed_bin_99_00086	renamed_bin_99	GO:0016798	3.2.1.8	xynC_1	ab initio prediction:Prodigal:2.6,similar to AA sequence:UniProtKB:O69230	Endo-1%2C4-beta-xylanase C
230	bin_49_contig00008:57161-57547	5.95	7.04	8.31	8.11	renamed_bin_49_01110	renamed_bin_49	GO:0005506|GO:0016491|GO:0055114	1.15.1.2	dfx_1	ab initio prediction:Prodigal:2.6,similar to AA sequence:UniProtKB:P20418	Desulfoferrodoxin
231	bin_51_contig00018:25795-26109	7.7	7.38	7.31	7.04	renamed_bin_51_01073	renamed_bin_51	GO:0016625|GO:0051539		porD_1	ab initio prediction:Prodigal:2.6,similar to AA sequence:UniProtKB:Q56316	Pyruvate synthase subunit PorD
232	bin_51_contig00017:411-1091	7.19	7.58	6.99	7.68	renamed_bin_51_01014	renamed_bin_51	GO:0003700|GO:0006355		mcbR_1	ab initio prediction:Prodigal:2.6,similar to AA sequence:UniProtKB:P76114	HTH-type transcriptional regulator McbR
233	bin_11_contig00007:64880-65155	7.48	7.71	6.97	7.29	renamed_bin_11_01291	renamed_bin_11	GO:0003677		hupA	ab initio prediction:Prodigal:2.6,similar to AA sequence:UniProtKB:P08821	DNA-binding protein HU 1
234	bin_171_contig00033:4708-5307	6.73	6.76	8.08	7.89	renamed_bin_171_00783	renamed_bin_171	GO:0004784|GO:0006801|GO:0046872|GO:0055114	1.15.1.1	sodA	ab initio prediction:Prodigal:2.6,similar to AA sequence:UniProtKB:P80293	Superoxide dismutase [Mn/Fe]
235	bin_111_contig00033:6598-7248	6.86	7.45	7.66	7.5	renamed_bin_111_01481	renamed_bin_111	GO:0004107|GO:0009073
236	bin_106_contig00005:78010-78768	7.53	7.5	7.33	7.13	renamed_bin_106_00476	renamed_bin_106
237	bin_122_contig00061:6821-7093	6.57	6.6	7.76	8.57	renamed_bin_122_01454	renamed_bin_122	GO:0003677		hup_3	ab initio prediction:Prodigal:2.6,similar to AA sequence:UniProtKB:Q99U17	DNA-binding protein HU
238	bin_54_contig00002:117413-119776	6.64	6.48	10.06	6.32	renamed_bin_54_00296	renamed_bin_54			sarA_1	ab initio prediction:Prodigal:2.6,similar to AA sequence:UniProtKB:P31306	Oligopeptide-binding protein SarA
239	bin_2_contig00001:262076-262384	7.65	6.72	7.76	7.38	renamed_bin_2_00242	renamed_bin_2	GO:0003676
240	bin_49_contig00004:59-907	7.96	7.21	7.36	6.98	renamed_bin_49_00546	renamed_bin_49
241	bin_20_contig00011:54094-55131	7.12	6.61	8.21	7.59	renamed_bin_20_01331	renamed_bin_20	GO:0006730|GO:0008168	2.1.1.86	mtrH	ab initio prediction:Prodigal:2.6,similar to AA sequence:UniProtKB:P80650	Tetrahydromethanopterin S-methyltransferase subunit H
242	bin_168_contig00224:660-893	7.38	7.68	6.62	7.94	renamed_bin_168_01715	renamed_bin_168	GO:0006633		acpP	ab initio prediction:Prodigal:2.6,similar to AA sequence:UniProtKB:O67611	Acyl carrier protein
243	bin_32_contig00001:219241-219315	7.02	9.46	6.63	6.51	renamed_bin_32_00217	renamed_bin_32
244	bin_108_contig00005:5197-5547	6.58	6.29	8.02	8.75	renamed_bin_108_00358	renamed_bin_108			ssrA	COORDINATES:profile:Aragorn:1.2	transfer-messenger RNA%2C SsrA
245	bin_282_contig00002:242-1633	7.01	7.09	9.68	5.87	renamed_bin_282_00033	renamed_bin_282
246	bin_106_contig00010:31886-32290	7.68	7.48	7.3	7.21	renamed_bin_106_00788	renamed_bin_106	GO:0016209|GO:0016491|GO:0055114	1.11.1.15	prxU_1	ab initio prediction:Prodigal:2.6,similar to AA sequence:UniProtKB:Q9L3Q5	Selenocysteine-containing peroxiredoxin PrxU
247	bin_11_contig00001:183742-184062	7.63	7.63	7	7.45	renamed_bin_11_00198	renamed_bin_11	GO:0006662|GO:0015035|GO:0045454		trxA_1	ab initio prediction:Prodigal:2.6,similar to AA sequence:UniProtKB:Q2FZD2	Thioredoxin
248	bin_106_contig00004:18784-18981	7.52	7.33	7.58	7.28	renamed_bin_106_00327	renamed_bin_106
249	bin_106_contig00007:30752-31138	7.77	7.52	7.23	7.21	renamed_bin_106_00593	renamed_bin_106	GO:0003697|GO:0006260		ssbA	ab initio prediction:Prodigal:2.6,similar to AA sequence:UniProtKB:P37455	Single-stranded DNA-binding protein A
250	bin_20_contig00006:48300-48425	7.32	6.61	8.19	7.63	renamed_bin_20_00864	renamed_bin_20	GO:0005506
251	bin_51_contig00003:9046-9516	7.53	7.21	7.34	7.68	renamed_bin_51_00329	renamed_bin_51			iscR	ab initio prediction:Prodigal:2.6,similar to AA sequence:UniProtKB:P0AGK8	HTH-type transcriptional regulator IscR
252	bin_106_contig00006:26920-27024	7.52	7.39	7.58	7.27	renamed_bin_106_00511	renamed_bin_106
253	bin_11_contig00013:543-854	7.51	7.68	7.27	7.31	renamed_bin_11_01622	renamed_bin_11	GO:0003677
254	bin_141_contig00002:60742-61497	7.72	7.22	7	7.84	renamed_bin_141_00117	renamed_bin_141	GO:0006810|GO:0008565|GO:0016020		exbB_2	ab initio prediction:Prodigal:2.6,similar to AA sequence:UniProtKB:P0ABU7	Biopolymer transport protein ExbB
255	bin_70_contig00003:70103-70375	8.73	5.58	8.36	7.11	renamed_bin_70_00366	renamed_bin_70	GO:0003677		hup	ab initio prediction:Prodigal:2.6,similar to AA sequence:UniProtKB:Q99U17	DNA-binding protein HU
256	bin_75_contig00028:8442-9023	8.29	7.96	7.07	6.47	renamed_bin_75_01451	renamed_bin_75	GO:0015948|GO:0051186|GO:0051539|GO:0051912|GO:0055114	1.8.98.1	hdrC	ab initio prediction:Prodigal:2.6,similar to AA sequence:UniProtKB:Q50754	CoB--CoM heterodisulfide reductase iron-sulfur subunit C
257	bin_75_contig00028:9028-9927	8.29	8.04	7.01	6.48	renamed_bin_75_01452	renamed_bin_75	GO:0015948|GO:0051186|GO:0051912|GO:0055114	1.8.98.1	hdrB	ab initio prediction:Prodigal:2.6,similar to AA sequence:UniProtKB:Q50755	CoB--CoM heterodisulfide reductase subunit B
258	bin_75_contig00014:36268-36618	7.75	7.72	7.47	6.88	renamed_bin_75_00961	renamed_bin_75	GO:0003676|GO:0005622
259	bin_11_contig00003:3686-3976	7.34	7.68	7.3	7.54	renamed_bin_11_00611	renamed_bin_11
260	bin_75_contig00004:29213-31189	7.96	7.7	7.4	6.81	renamed_bin_75_00330	renamed_bin_75
261	bin_75_contig00026:30111-30518	6.84	6.92	8.37	7.78	renamed_bin_75_01405	renamed_bin_75	GO:0003677|GO:0004803|GO:0006313
262	bin_788_contig00021:1785-3377	7.28	6.56	8.34	7.74	renamed_bin_788_00154	renamed_bin_788
263	bin_11_contig00012:28732-29136	7.29	7.81	7.31	7.66	renamed_bin_11_01613	renamed_bin_11
264	bin_126_contig00009:24606-25436	7.8	7.56	7.33	7.38	renamed_bin_126_00477	renamed_bin_126
265	bin_106_contig00007:67222-67704	7.82	7.37	7.55	7.36	renamed_bin_106_00634	renamed_bin_106
266	bin_126_contig00010:36241-36666	7.75	7.63	7.33	7.39	renamed_bin_126_00524	renamed_bin_126
267	bin_66_contig00044:252-602	7.64	7.54	7.48	7.45	renamed_bin_66_02091	renamed_bin_66	GO:0005198|GO:0071973		hag_2	ab initio prediction:Prodigal:2.6,similar to AA sequence:UniProtKB:Q05203	Flagellin
268	bin_7_contig00001:249742-251109	8.09	7.71	7.44	6.91	renamed_bin_7_00262	renamed_bin_7	GO:0008901|GO:0016151|GO:0055114	1.12.98.1	frhA	ab initio prediction:Prodigal:2.6,similar to AA sequence:UniProtKB:P80489	Coenzyme F420 hydrogenase subunit alpha
269	bin_75_contig00007:24731-25039	8.58	8.22	6.99	6.4	renamed_bin_75_00555	renamed_bin_75	GO:0003735|GO:0005840|GO:0006412
270	bin_107_contig00002:26886-27242	7.72	7.2	7.57	7.7	renamed_bin_107_00125	renamed_bin_107			ssrA	COORDINATES:profile:Aragorn:1.2	transfer-messenger RNA%2C SsrA
271	bin_126_contig00010:24555-25259	7.86	7.33	7.56	7.47	renamed_bin_126_00513	renamed_bin_126
272	bin_20_contig00016:93-494	7.04	6.64	8.56	8.04	renamed_bin_20_01484	renamed_bin_20
273	bin_130_contig00019:16965-17594	7.41	7.38	7.84	7.73	renamed_bin_130_00605	renamed_bin_130	GO:0031419|GO:0046872	2.1.1.13	metH_4	ab initio prediction:Prodigal:2.6,similar to AA sequence:UniProtKB:P13009	Methionine synthase
274	bin_122_contig00019:9507-9874	7.73	7.07	6.12	9.52	renamed_bin_122_00705	renamed_bin_122			ssrA	COORDINATES:profile:Aragorn:1.2	transfer-messenger RNA%2C SsrA
275	bin_106_contig00004:19002-19253	7.94	7.36	7.64	7.5	renamed_bin_106_00328	renamed_bin_106	GO:0003723|GO:0006353|GO:0006355		mtrB	ab initio prediction:Prodigal:2.6,similar to AA sequence:UniProtKB:Q9X6J6	Transcription attenuation protein MtrB
276	bin_77_contig00004:41745-42179	7.15	7.57	7.88	7.84	renamed_bin_77_00447	renamed_bin_77	GO:0006950|GO:0055114	1.16.-.-	dps	ab initio prediction:Prodigal:2.6,similar to AA sequence:UniProtKB:Q0P891	DNA protection during starvation protein
277	bin_20_contig00010:5262-6329	7.4	6.8	8.42	7.9	renamed_bin_20_01224	renamed_bin_20	GO:0016491	1.1.1.103	tdh	ab initio prediction:Prodigal:2.6,similar to AA sequence:UniProtKB:O58389	L-threonine 3-dehydrogenase
278	bin_168_contig00072:1191-1793	8.11	7.04	7.36	8.06	renamed_bin_168_01247	renamed_bin_168
279	bin_18_contig00002:207081-207371	7.33	8.03	7.29	7.92	renamed_bin_18_00491	renamed_bin_18
280	bin_26_contig00001:134969-135985	7.25	8.65	7.27	7.41	renamed_bin_26_00129	renamed_bin_26	GO:0003677|GO:0006355		hrcA	ab initio prediction:Prodigal:2.6,similar to AA sequence:UniProtKB:P30727	Heat-inducible transcription repressor HrcA
281	bin_75_contig00044:18264-18422	8.07	7.96	7.35	7.21	renamed_bin_75_01825	renamed_bin_75
282	bin_51_contig00007:14945-16033	7.59	7.59	7.8	7.67	renamed_bin_51_00577	renamed_bin_51	GO:0005886
283	bin_106_contig00006:20676-21158	7.93	7.73	7.41	7.59	renamed_bin_106_00502	renamed_bin_106		3.5.1.88	def	ab initio prediction:Prodigal:2.6,similar to AA sequence:UniProtKB:P96113	Peptide deformylase
284	bin_10_contig00003:79236-79586	7.4	8.94	6.79	7.57	renamed_bin_10_00574	renamed_bin_10			ssrA	COORDINATES:profile:Aragorn:1.2	transfer-messenger RNA%2C SsrA
285	bin_23_contig00001:57375-58037	8.02	7.46	7.76	7.48	renamed_bin_23_00060	renamed_bin_23	GO:0004553|GO:0016052|GO:0030246
286	bin_60_contig00007:46773-47120	7.11	7.41	7.82	8.38	renamed_bin_60_00818	renamed_bin_60			ssrA	COORDINATES:profile:Aragorn:1.2	transfer-messenger RNA%2C SsrA
287	bin_20_contig00009:57334-57663	7.49	6.98	8.54	7.76	renamed_bin_20_01190	renamed_bin_20
288	bin_20_contig00011:55180-55653	7.45	6.97	8.53	7.85	renamed_bin_20_01332	renamed_bin_20	GO:0015948|GO:0016021|GO:0030269	2.1.1.86	mtrA1_2	ab initio prediction:Prodigal:2.6,similar to AA sequence:UniProtKB:P80184	Tetrahydromethanopterin S-methyltransferase subunit A 1
289	bin_126_contig00007:20433-20912	7.9	7.67	7.67	7.59	renamed_bin_126_00395	renamed_bin_126			carD	ab initio prediction:Prodigal:2.6,similar to AA sequence:UniProtKB:A0R561	RNA polymerase-binding transcription factor CarD
290	bin_49_contig00006:81253-81687	6.16	7.37	8.89	8.41	renamed_bin_49_00907	renamed_bin_49	GO:0006950|GO:0055114	1.16.-.-	dps	ab initio prediction:Prodigal:2.6,similar to AA sequence:UniProtKB:P43313	DNA protection during starvation protein
291	bin_51_contig00007:1046-2011	7.91	7.26	7.83	7.86	renamed_bin_51_00566	renamed_bin_51			alsB	ab initio prediction:Prodigal:2.6,similar to AA sequence:UniProtKB:P39265	D-allose-binding periplasmic protein
292	bin_126_contig00035:3510-3992	8.08	8	7.26	7.57	renamed_bin_126_01076	renamed_bin_126	GO:0005515
293	bin_65_contig00003:75615-79421	8.2	7.76	7.44	7.55	renamed_bin_65_00327	renamed_bin_65
294	bin_85_contig00014:6679-7032	8.87	8.74	5.78	7.59	renamed_bin_85_00968	renamed_bin_85			ssrA	COORDINATES:profile:Aragorn:1.2	transfer-messenger RNA%2C SsrA
295	bin_75_contig00006:19435-20037	8.52	8.25	7.27	6.95	renamed_bin_75_00473	renamed_bin_75
296	bin_54_contig00027:6333-7667	8.17	7.84	7.65	7.33	renamed_bin_54_01534	renamed_bin_54			cycB	ab initio prediction:Prodigal:2.6,similar to AA sequence:UniProtKB:O07009	Cyclodextrin-binding protein
297	bin_10_contig00004:125403-126416	8.26	6.72	8.23	7.79	renamed_bin_10_00744	renamed_bin_10	GO:0051287|GO:0055114	1.1.1.28	ldhA	ab initio prediction:Prodigal:2.6,similar to AA sequence:UniProtKB:P52643	D-lactate dehydrogenase
298	bin_24_contig00001:73320-73697	7.78	8.1	7.51	7.61	renamed_bin_24_00074	renamed_bin_24
299	bin_93_contig00051:6305-6660	7.49	8.18	6.9	8.47	renamed_bin_93_01574	renamed_bin_93			ssrA	COORDINATES:profile:Aragorn:1.2	transfer-messenger RNA%2C SsrA
300	bin_11_contig00002:163680-165287	7.81	7.71	7.74	7.78	renamed_bin_11_00516	renamed_bin_11
301	bin_101_contig00040:20697-20939	8.07	8.19	7.52	7.3	renamed_bin_101_01545	renamed_bin_101	GO:0015078|GO:0015991|GO:0033177		ntpK_2	ab initio prediction:Prodigal:2.6,similar to AA sequence:UniProtKB:P43457	V-type sodium ATPase subunit K
302	bin_51_contig00016:15497-15634	7.89	6.97	8.17	8.05	renamed_bin_51_00993	renamed_bin_51
303	bin_7_contig00001:252610-253497	8.41	7.97	7.66	7.06	renamed_bin_7_00265	renamed_bin_7	GO:0016151|GO:0050454|GO:0050660|GO:0051536|GO:0055114	1.12.98.1	frhB	ab initio prediction:Prodigal:2.6,similar to AA sequence:UniProtKB:P80490	Coenzyme F420 hydrogenase subunit beta
304	bin_48_contig00030:21140-21490	7.88	7.85	6.82	8.56	renamed_bin_48_01858	renamed_bin_48			ssrA	COORDINATES:profile:Aragorn:1.2	transfer-messenger RNA%2C SsrA
305	bin_75_contig00032:8070-8735	7.57	7.09	8.53	7.96	renamed_bin_75_01540	renamed_bin_75		3.6.1.7	acyP_4	ab initio prediction:Prodigal:2.6,similar to AA sequence:UniProtKB:Q97ZL0	Acylphosphatase
306	bin_26_contig00001:234853-235068	7.04	9.16	7.32	7.72	renamed_bin_26_00219	renamed_bin_26
307	bin_1046_contig00054:7-150	7.64	8.18	8.8	6.65	renamed_bin_1046_00171	renamed_bin_1046
308	bin_54_contig00009:63126-65198	8.52	7.97	7.8	7	renamed_bin_54_00985	renamed_bin_54
309	bin_75_contig00028:7262-8431	8.76	8.42	7.36	6.8	renamed_bin_75_01450	renamed_bin_75			mvhB_2	ab initio prediction:Prodigal:2.6,similar to AA sequence:UniProtKB:P60232	Polyferredoxin protein MvhB
310	bin_126_contig00001:51709-52680	8.36	8.01	7.47	7.5	renamed_bin_126_00055	renamed_bin_126	GO:0005524
311	bin_75_contig00001:69361-69690	8.42	8.32	7.71	6.9	renamed_bin_75_00073	renamed_bin_75
312	bin_57_contig00003:117283-117358	7.31	7.25	8.44	8.41	renamed_bin_57_00403	renamed_bin_57
313	bin_26_contig00004:11817-12221	7.71	9.82	6.58	7.33	renamed_bin_26_00458	renamed_bin_26
314	bin_20_contig00006:69344-69571	7.76	7.18	8.68	7.84	renamed_bin_20_00887	renamed_bin_20
315	bin_75_contig00001:67134-67382	8.67	8.37	7.59	6.84	renamed_bin_75_00071	renamed_bin_75	GO:0015078|GO:0015991|GO:0033177		atpH	ab initio prediction:Prodigal:2.6,protein motif:HAMAP:MF_01396	ATP synthase subunit c
316	bin_126_contig00052:10-531	7.97	7.62	7.94	7.97	renamed_bin_126_01228	renamed_bin_126			chvE_2	ab initio prediction:Prodigal:2.6,similar to AA sequence:UniProtKB:P25548	Multiple sugar-binding periplasmic receptor ChvE
317	bin_75_contig00003:32023-32424	8.34	8	7.88	7.28	renamed_bin_75_00276	renamed_bin_75
318	bin_75_contig00007:50534-50770	8.29	8.66	7.46	7.12	renamed_bin_75_00585	renamed_bin_75
319	bin_75_contig00004:4248-4484	8.29	8.58	7.61	7.07	renamed_bin_75_00310	renamed_bin_75	GO:0003743|GO:0006413		eIF1A_1	ab initio prediction:Prodigal:2.6,similar to AA sequence:UniProtKB:Q57887	Translation initiation factor 1A
320	bin_126_contig00008:11322-12296	8.11	7.54	8.03	7.88	renamed_bin_126_00431	renamed_bin_126	GO:0005886		tmpC_1	ab initio prediction:Prodigal:2.6,similar to AA sequence:UniProtKB:P29724	Membrane lipoprotein TmpC
321	bin_51_contig00021:10097-10381	8.31	7.88	7.79	7.62	renamed_bin_51_01138	renamed_bin_51	GO:0003677		hicB	ab initio prediction:Prodigal:2.6,similar to AA sequence:UniProtKB:P67697	Antitoxin HicB
322	bin_126_contig00011:11947-12486	8.14	7.9	7.94	7.62	renamed_bin_126_00552	renamed_bin_126	GO:0044238		hpf	ab initio prediction:Prodigal:2.6,similar to AA sequence:UniProtKB:Q5XAQ7	Ribosome hibernation promotion factor
323	bin_111_contig00017:3418-4566	7.72	6.18	9.08	8.64	renamed_bin_111_00958	renamed_bin_111	GO:0016491|GO:0055114	1.1.1.17	mtlD	ab initio prediction:Prodigal:2.6,similar to AA sequence:UniProtKB:P09424	Mannitol-1-phosphate 5-dehydrogenase
324	bin_75_contig00011:32906-33415	8.07	8.18	8.05	7.33	renamed_bin_75_00819	renamed_bin_75
325	bin_75_contig00001:19626-19832	8.28	8.54	7.62	7.2	renamed_bin_75_00022	renamed_bin_75	GO:0046982		han1A	ab initio prediction:Prodigal:2.6,similar to AA sequence:UniProtKB:P95669	Archaeal histone HAN1 subunit A
326	bin_126_contig00024:33-521	8.03	7.9	7.9	7.88	renamed_bin_126_00892	renamed_bin_126			ltrA	ab initio prediction:Prodigal:2.6,similar to AA sequence:UniProtKB:P0A3U0	Group II intron-encoded protein LtrA
327	bin_11_contig00006:105670-106092	8.19	8.37	7.54	7.65	renamed_bin_11_01222	renamed_bin_11
328	bin_165_contig00004:3209-3844	7.82	6.96	8.41	8.58	renamed_bin_165_00135	renamed_bin_165	GO:0003824|GO:0008152	5.3.1.24	trpF	ab initio prediction:Prodigal:2.6,similar to AA sequence:UniProtKB:Q56320	N-(5'-phosphoribosyl)anthranilate isomerase
329	bin_54_contig00006:21571-21846	7.78	8.42	7.77	7.85	renamed_bin_54_00715	renamed_bin_54	GO:0003677		hup_1	ab initio prediction:Prodigal:2.6,similar to AA sequence:UniProtKB:Q99U17	DNA-binding protein HU
330	bin_96_contig00015:25010-25618	8.02	7.08	8.62	8.12	renamed_bin_96_01022	renamed_bin_96	GO:0004784|GO:0006801|GO:0046872|GO:0055114	1.15.1.1	sodA	ab initio prediction:Prodigal:2.6,similar to AA sequence:UniProtKB:P00449	Superoxide dismutase [Mn]
331	bin_111_contig00017:5041-6792	7.76	6.32	9.19	8.58	renamed_bin_111_00960	renamed_bin_111	GO:0008982|GO:0009401		mtlA	ab initio prediction:Prodigal:2.6,similar to AA sequence:UniProtKB:P50852	PTS system mannitol-specific EIICB component
332	bin_51_contig00003:9633-11285	8.08	7.9	7.86	8.15	renamed_bin_51_00330	renamed_bin_51	GO:0003824|GO:0055114	1.7.99.1	hcp	ab initio prediction:Prodigal:2.6,similar to AA sequence:UniProtKB:P75825	Hydroxylamine reductase
333	bin_20_contig00006:47938-48294	7.79	7.3	8.79	8.16	renamed_bin_20_00863	renamed_bin_20	GO:0051920|GO:0055114
334	bin_7_contig00001:251685-252599	8.62	8.11	8.02	7.32	renamed_bin_7_00264	renamed_bin_7	GO:0051536|GO:0055114	1.12.98.1	frhG	ab initio prediction:Prodigal:2.6,similar to AA sequence:UniProtKB:P80491	Coenzyme F420 hydrogenase subunit gamma
335	bin_32_contig00059:118-1419	7.89	8.49	7.38	8.36	renamed_bin_32_00597	renamed_bin_32
336	bin_75_contig00028:6974-7246	8.99	8.57	7.56	7.01	renamed_bin_75_01449	renamed_bin_75			mvhB_1	ab initio prediction:Prodigal:2.6,similar to AA sequence:UniProtKB:P60232	Polyferredoxin protein MvhB
337	bin_126_contig00036:8927-9136	7.93	7.99	8.34	7.87	renamed_bin_126_01095	renamed_bin_126	GO:0003735|GO:0005622|GO:0005840|GO:0006412		rpmE	ab initio prediction:Prodigal:2.6,similar to AA sequence:UniProtKB:Q03223	50S ribosomal protein L31
338	bin_54_contig00003:97358-98542	8.43	8.04	8.15	7.56	renamed_bin_54_00444	renamed_bin_54	GO:0003746|GO:0005525|GO:0005622|GO:0006414		tuf_1	ab initio prediction:Prodigal:2.6,similar to AA sequence:UniProtKB:P22679	Elongation factor Tu
339	bin_17_contig00008:6831-7103	7.91	7.23	8.77	8.3	renamed_bin_17_00951	renamed_bin_17	GO:0003677		hupB	ab initio prediction:Prodigal:2.6,similar to AA sequence:UniProtKB:P0ACF4	DNA-binding protein HU-beta
340	bin_77_contig00005:32294-32649	7.96	8.33	7.8	8.15	renamed_bin_77_00553	renamed_bin_77			ssrA	COORDINATES:profile:Aragorn:1.2	transfer-messenger RNA%2C SsrA
341	bin_98_contig00006:19868-20219	7.66	7.36	8.77	8.47	renamed_bin_98_00405	renamed_bin_98			ssrA	COORDINATES:profile:Aragorn:1.2	transfer-messenger RNA%2C SsrA
342	bin_54_contig00027:11768-12349	8.59	8.4	7.63	7.65	renamed_bin_54_01538	renamed_bin_54
343	bin_20_contig00005:59641-60483	7.94	7.5	8.73	8.13	renamed_bin_20_00744	renamed_bin_20	GO:0008901|GO:0015948|GO:0055114	1.5.98.1	mtd	ab initio prediction:Prodigal:2.6,similar to AA sequence:UniProtKB:O29544	F420-dependent methylenetetrahydromethanopterin dehydrogenase
344	bin_326_contig00001:14137-15408	7.71	9.91	7.87	6.83	renamed_bin_326_00011	renamed_bin_326
345	bin_126_contig00004:57881-58594	8.34	8.13	7.91	7.95	renamed_bin_126_00274	renamed_bin_126	GO:0003677		yttP	ab initio prediction:Prodigal:2.6,similar to AA sequence:UniProtKB:O34970	putative HTH-type transcriptional regulator YttP
346	bin_57_contig00009:73599-73964	8.97	8.95	6.87	7.58	renamed_bin_57_00882	renamed_bin_57
347	bin_159_contig00002:33978-34330	9.19	7.95	9.12	6.13	renamed_bin_159_00092	renamed_bin_159			ssrA	COORDINATES:profile:Aragorn:1.2	transfer-messenger RNA%2C SsrA
348	bin_204_contig00003:2725-3174	10.12	8.51	7.14	6.7	renamed_bin_204_00092	renamed_bin_204			hspA	ab initio prediction:Prodigal:2.6,similar to AA sequence:UniProtKB:Q06823	Spore protein SP21
349	bin_10_contig00004:122668-123639	8.86	7.23	8.49	7.9	renamed_bin_10_00742	renamed_bin_10	GO:0003824|GO:0005975|GO:0016616|GO:0055114	1.1.1.27	ldh_2	ab initio prediction:Prodigal:2.6,similar to AA sequence:UniProtKB:P00345	L-lactate dehydrogenase
350	bin_36_contig00015:1283-2044	8.2	8.18	8.21	7.9	renamed_bin_36_01036	renamed_bin_36	GO:0005198|GO:0071973		hag_2	ab initio prediction:Prodigal:2.6,similar to AA sequence:UniProtKB:Q05203	Flagellin
351	bin_106_contig00005:20446-21414	8.33	7.72	8.31	8.13	renamed_bin_106_00422	renamed_bin_106			alsB_1	ab initio prediction:Prodigal:2.6,similar to AA sequence:UniProtKB:P39265	D-allose-binding periplasmic protein
352	bin_23_contig00015:1455-2876	8.24	7.91	8.31	8.04	renamed_bin_23_01647	renamed_bin_23	GO:0030246
353	bin_11_contig00003:150721-150921	7.55	8.26	8.47	8.28	renamed_bin_11_00758	renamed_bin_11	GO:0003677|GO:0006355		cspB_1	ab initio prediction:Prodigal:2.6,similar to AA sequence:UniProtKB:P41016	Cold shock protein CspB
354	bin_440_contig00017:4749-5117	8.66	7.97	7.65	8.3	renamed_bin_440_00193	renamed_bin_440			ssrA	COORDINATES:profile:Aragorn:1.2	transfer-messenger RNA%2C SsrA
355	bin_75_contig00028:23048-23899	8.88	8.68	7.71	7.35	renamed_bin_75_01465	renamed_bin_75	GO:0005737|GO:0006814|GO:0012506|GO:0030269	2.1.1.86	mtrD	ab initio prediction:Prodigal:2.6,similar to AA sequence:UniProtKB:P80653	Tetrahydromethanopterin S-methyltransferase subunit D
356	bin_12_contig00001:57724-58072	7.65	7.63	8.68	8.67	renamed_bin_12_00051	renamed_bin_12			ssrA	COORDINATES:profile:Aragorn:1.2	transfer-messenger RNA%2C SsrA
357	bin_99_contig00005:55977-56177	7.82	8.4	8.65	7.78	renamed_bin_99_00427	renamed_bin_99	GO:0003676		cspB_1	ab initio prediction:Prodigal:2.6,similar to AA sequence:UniProtKB:P41016	Cold shock protein CspB
358	bin_75_contig00002:46011-46610	8.76	8.82	7.86	7.24	renamed_bin_75_00215	renamed_bin_75	GO:0005198|GO:0006928		flgA2	ab initio prediction:Prodigal:2.6,similar to AA sequence:UniProtKB:D4GWY2	Flagellin A2
359	bin_126_contig00009:2185-3849	8.28	7.85	8.38	8.19	renamed_bin_126_00463	renamed_bin_126
360	bin_106_contig00002:16153-17388	8.33	7.86	8.34	8.17	renamed_bin_106_00141	renamed_bin_106	GO:0005215|GO:0006810		ugpB_1	ab initio prediction:Prodigal:2.6,similar to AA sequence:UniProtKB:P0AG80	sn-glycerol-3-phosphate-binding periplasmic protein UgpB
361	bin_75_contig00003:37216-39282	8.14	7.91	8.67	8.08	renamed_bin_75_00283	renamed_bin_75	GO:0009055|GO:0016491|GO:0055114	1.2.1.2	fdhA_1	ab initio prediction:Prodigal:2.6,similar to AA sequence:UniProtKB:P06131	Formate dehydrogenase subunit alpha
362	bin_23_contig00007:58836-59096	7.3	8.33	9.07	8.13	renamed_bin_23_01038	renamed_bin_23	GO:0042710
363	bin_51_contig00027:15087-15563	8.25	7.81	8.52	8.27	renamed_bin_51_01263	renamed_bin_51	GO:0003700|GO:0006355		perR	ab initio prediction:Prodigal:2.6,similar to AA sequence:UniProtKB:Q97FU2	Transcriptional regulator PerR
364	bin_171_contig00017:2539-3111	7.79	7.46	8.92	8.7	renamed_bin_171_00528	renamed_bin_171	GO:0016491|GO:0046872|GO:0055114		rbr	ab initio prediction:Prodigal:2.6,similar to AA sequence:UniProtKB:P24931	Rubrerythrin
365	bin_10_contig00004:123721-125382	8.81	7.34	8.66	8.08	renamed_bin_10_00743	renamed_bin_10	GO:0005887|GO:0015129|GO:0015727		lutP	ab initio prediction:Prodigal:2.6,similar to AA sequence:UniProtKB:P71067	L-lactate permease
366	bin_106_contig00018:24501-26111	8.21	8.04	8.36	8.28	renamed_bin_106_01062	renamed_bin_106
367	bin_1046_contig00002:2555-2836	7.91	9.92	6.03	9.04	renamed_bin_1046_00009	renamed_bin_1046
368	bin_13_contig00001:91211-91471	8.29	8.42	7.8	8.42	renamed_bin_13_00093	renamed_bin_13			spoVS	ab initio prediction:Prodigal:2.6,similar to AA sequence:UniProtKB:P45693	Stage V sporulation protein S
369	bin_168_contig00058:9997-10434	8.05	7.98	7.95	8.97	renamed_bin_168_01141	renamed_bin_168			fimA	ab initio prediction:Prodigal:2.6,similar to AA sequence:UniProtKB:P02975	Fimbrial protein
370	bin_20_contig00016:27785-28162	7.82	7.46	9.11	8.6	renamed_bin_20_01518	renamed_bin_20
371	bin_51_contig00006:203-709	8.1	7.9	8.53	8.47	renamed_bin_51_00516	renamed_bin_51
372	bin_168_contig00013:23428-24324	8.42	7.24	8.37	8.99	renamed_bin_168_00483	renamed_bin_168
373	bin_326_contig00001:15419-15616	7.73	10.25	8.15	6.9	renamed_bin_326_00012	renamed_bin_326
374	bin_20_contig00007:30268-30495	8.71	7.65	8.63	8.07	renamed_bin_20_00966	renamed_bin_20
375	bin_99_contig00030:6701-7056	8.2	8.44	7.92	8.53	renamed_bin_99_01530	renamed_bin_99			ssrA	COORDINATES:profile:Aragorn:1.2	transfer-messenger RNA%2C SsrA
376	bin_75_contig00012:34795-36000	8.65	8.81	8.09	7.54	renamed_bin_75_00868	renamed_bin_75
377	bin_75_contig00005:16183-17457	8.69	8.97	7.74	7.8	renamed_bin_75_00386	renamed_bin_75	GO:0016616|GO:0055114	1.1.1.299	mdh_1	ab initio prediction:Prodigal:2.6,similar to AA sequence:UniProtKB:D9PVI7	Malate dehydrogenase
378	bin_20_contig00005:100957-101229	8.22	7.79	8.95	8.29	renamed_bin_20_00793	renamed_bin_20			mvhB_1	ab initio prediction:Prodigal:2.6,similar to AA sequence:UniProtKB:P60232	Polyferredoxin protein MvhB
379	bin_106_contig00009:39681-40133	8.3	8.11	8.56	8.32	renamed_bin_106_00750	renamed_bin_106
380	bin_125_contig00056:9651-10001	8.73	8.89	7.93	7.83	renamed_bin_125_01852	renamed_bin_125			ssrA	COORDINATES:profile:Aragorn:1.2	transfer-messenger RNA%2C SsrA
381	bin_50_contig00031:9863-10221	8.25	8.33	8.39	8.44	renamed_bin_50_01770	renamed_bin_50			ssrA	COORDINATES:profile:Aragorn:1.2	transfer-messenger RNA%2C SsrA
382	bin_51_contig00014:23260-24948	8.36	8.11	8.62	8.64	renamed_bin_51_00923	renamed_bin_51			appA	ab initio prediction:Prodigal:2.6,similar to AA sequence:UniProtKB:P42061	Oligopeptide-binding protein AppA
383	bin_34_contig00003:93151-93423	7.4	8.14	9.14	9.12	renamed_bin_34_00536	renamed_bin_34
384	bin_2_contig00006:67307-67660	8.44	8.02	8.91	8.49	renamed_bin_2_01201	renamed_bin_2			ssrA	COORDINATES:profile:Aragorn:1.2	transfer-messenger RNA%2C SsrA
385	bin_33_contig00005:132959-133354	8.71	8.64	7.85	8.69	renamed_bin_33_00787	renamed_bin_33			ssrA	COORDINATES:profile:Aragorn:1.2	transfer-messenger RNA%2C SsrA
386	bin_75_contig00017:14734-15576	9.19	9.07	8.06	7.6	renamed_bin_75_01090	renamed_bin_75	GO:0008901|GO:0015948|GO:0055114	1.5.98.1	mtd	ab initio prediction:Prodigal:2.6,similar to AA sequence:UniProtKB:O29544	F420-dependent methylenetetrahydromethanopterin dehydrogenase
387	bin_25_contig00024:22399-22818	8.8	8.82	7.72	8.61	renamed_bin_25_01951	renamed_bin_25			ssrA	COORDINATES:profile:Aragorn:1.2	transfer-messenger RNA%2C SsrA
388	bin_23_contig00005:95073-95432	8.33	8.59	8.48	8.58	renamed_bin_23_00870	renamed_bin_23			ssrA	COORDINATES:profile:Aragorn:1.2	transfer-messenger RNA%2C SsrA
389	bin_7_contig00018:24684-25997	8.69	8.63	8.61	8.06	renamed_bin_7_01708	renamed_bin_7
390	bin_7_contig00001:251120-251683	9.19	8.57	8.49	7.76	renamed_bin_7_00263	renamed_bin_7	GO:0006464|GO:0008233
391	bin_106_contig00019:11225-11365	8.72	8.67	8.21	8.49	renamed_bin_106_01074	renamed_bin_106
392	bin_80_contig00005:48978-49337	8.46	8.21	8.53	8.91	renamed_bin_80_00385	renamed_bin_80			ssrA	COORDINATES:profile:Aragorn:1.2	transfer-messenger RNA%2C SsrA
393	bin_10_contig00010:37737-40547	8.67	7.69	9.16	8.6	renamed_bin_10_01170	renamed_bin_10	GO:0003824|GO:0030976	1.2.7.1	por	ab initio prediction:Prodigal:2.6,similar to AA sequence:UniProtKB:P94692	Pyruvate synthase
394	bin_106_contig00001:65646-65966	8.77	8.28	8.49	8.59	renamed_bin_106_00071	renamed_bin_106	GO:0006662|GO:0015035|GO:0045454		trxA_1	ab initio prediction:Prodigal:2.6,similar to AA sequence:UniProtKB:Q2FZD2	Thioredoxin
395	bin_167_contig00023:16803-17228	7.92	7.97	8.75	9.51	renamed_bin_167_00670	renamed_bin_167	GO:0003735|GO:0005840|GO:0006412		rplK	ab initio prediction:Prodigal:2.6,similar to AA sequence:UniProtKB:Q06796	50S ribosomal protein L11
396	bin_20_contig00005:118705-118989	8.33	7.7	9.39	8.74	renamed_bin_20_00811	renamed_bin_20	GO:0015948|GO:0016021|GO:0030269	2.1.1.86	mtrB	ab initio prediction:Prodigal:2.6,similar to AA sequence:UniProtKB:P80655	Tetrahydromethanopterin S-methyltransferase subunit B
397	bin_26_contig00004:12208-13176	8.49	10.41	7.38	7.92	renamed_bin_26_00459	renamed_bin_26
398	bin_126_contig00008:40725-41219	8.71	8.79	8.16	8.59	renamed_bin_126_00459	renamed_bin_126	GO:0007155|GO:0009289		csgB_2	ab initio prediction:Prodigal:2.6,similar to AA sequence:UniProtKB:P0A1E9	Minor curlin subunit
399	bin_115_contig00005:30518-30875	8.59	7.65	8.86	9.21	renamed_bin_115_00264	renamed_bin_115			ssrA	COORDINATES:profile:Aragorn:1.2	transfer-messenger RNA%2C SsrA
400	bin_56_contig00018:792-1141	8	8.37	8.97	8.99	renamed_bin_56_01925	renamed_bin_56			ssrA	COORDINATES:profile:Aragorn:1.2	transfer-messenger RNA%2C SsrA
401	bin_7_contig00041:5-2404	8.86	8.85	8.63	8.02	renamed_bin_7_01983	renamed_bin_7
402	bin_18_contig00009:81856-82222	8.94	8.95	7.98	8.62	renamed_bin_18_01427	renamed_bin_18			ssrA	COORDINATES:profile:Aragorn:1.2	transfer-messenger RNA%2C SsrA
403	bin_670_contig00005:5188-5538	8.4	8.21	8.8	9.09	renamed_bin_670_00048	renamed_bin_670			ssrA	COORDINATES:profile:Aragorn:1.2	transfer-messenger RNA%2C SsrA
404	bin_106_contig00008:24271-26487	8.62	8.37	8.86	8.67	renamed_bin_106_00660	renamed_bin_106			omp-alpha_2	ab initio prediction:Prodigal:2.6,similar to AA sequence:UniProtKB:Q01969	Outer membrane protein alpha
405	bin_139_contig00005:20070-20603	8.18	7.99	9.23	9.13	renamed_bin_139_00226	renamed_bin_139	GO:0016491|GO:0046872|GO:0055114
406	bin_106_contig00017:27517-29247	8.81	8.43	8.77	8.53	renamed_bin_106_01038	renamed_bin_106	GO:0043190|GO:0055085
407	bin_51_contig00005:35717-35989	8.63	8.27	9.04	8.73	renamed_bin_51_00476	renamed_bin_51
408	bin_168_contig00004:35292-38669	8.65	8.54	8.24	9.27	renamed_bin_168_00154	renamed_bin_168
409	bin_106_contig00001:17876-18136	8.81	9	8.46	8.5	renamed_bin_106_00022	renamed_bin_106			spoVS	ab initio prediction:Prodigal:2.6,similar to AA sequence:UniProtKB:P45693	Stage V sporulation protein S
410	bin_51_contig00027:14320-15000	8.69	8.37	9.04	8.68	renamed_bin_51_01262	renamed_bin_51	GO:0051920|GO:0055114	1.11.1.15		ab initio prediction:Prodigal:2.6,similar to AA sequence:UniProtKB:A0R1V9	Alkyl hydroperoxide reductase subunit C
411	bin_51_contig00005:35986-36618	8.64	8.37	8.96	8.86	renamed_bin_51_00477	renamed_bin_51	GO:0004385|GO:0006163	2.7.4.8	gmk	ab initio prediction:Prodigal:2.6,similar to AA sequence:UniProtKB:P60546	Guanylate kinase
412	bin_15_contig00002:118689-119039	8.69	7.83	9.08	9.31	renamed_bin_15_00397	renamed_bin_15			ssrA	COORDINATES:profile:Aragorn:1.2	transfer-messenger RNA%2C SsrA
413	bin_75_contig00028:24752-25036	9.33	9.35	8.27	7.98	renamed_bin_75_01467	renamed_bin_75	GO:0015948|GO:0016021|GO:0030269	2.1.1.86	mtrB	ab initio prediction:Prodigal:2.6,similar to AA sequence:UniProtKB:P80655	Tetrahydromethanopterin S-methyltransferase subunit B
414	bin_63_contig00038:5757-6143	9.27	9.37	7	9.35	renamed_bin_63_02364	renamed_bin_63			ssrA	COORDINATES:profile:Aragorn:1.2	transfer-messenger RNA%2C SsrA
415	bin_26_contig00007:2091-3689	8.81	10.13	7.78	8.27	renamed_bin_26_00607	renamed_bin_26
416	bin_106_contig00004:89568-89765	8.68	9.04	8.73	8.62	renamed_bin_106_00404	renamed_bin_106	GO:0003676		cspB	ab initio prediction:Prodigal:2.6,similar to AA sequence:UniProtKB:P41016	Cold shock protein CspB
417	bin_126_contig00016:14134-16599	8.98	8.49	8.85	8.76	renamed_bin_126_00721	renamed_bin_126
418	bin_26_contig00004:22111-23361	8.64	9.72	8.06	8.68	renamed_bin_26_00465	renamed_bin_26			cycB	ab initio prediction:Prodigal:2.6,similar to AA sequence:UniProtKB:O07009	Cyclodextrin-binding protein
419	bin_106_contig00006:17281-17547	8.85	8.61	8.85	8.84	renamed_bin_106_00498	renamed_bin_106
420	bin_51_contig00011:37680-38039	9.26	9.38	7.93	8.71	renamed_bin_51_00830	renamed_bin_51			ssrA	COORDINATES:profile:Aragorn:1.2	transfer-messenger RNA%2C SsrA
421	bin_75_contig00003:22838-23017	8.95	8.63	9.21	8.56	renamed_bin_75_00266	renamed_bin_75	GO:0006355
422	bin_20_contig00023:47-250	8.95	8.74	9.23	8.53	renamed_bin_20_01612	renamed_bin_20
423	bin_20_contig00005:56977-57945	8.53	8.18	9.74	9.04	renamed_bin_20_00741	renamed_bin_20	GO:0016705|GO:0055114	1.5.98.2	mer_1	ab initio prediction:Prodigal:2.6,similar to AA sequence:UniProtKB:O27784	5%2C10-methylenetetrahydromethanopterin reductase
424	bin_126_contig00009:37578-38567	9.1	8.72	8.89	8.81	renamed_bin_126_00489	renamed_bin_126			ytfQ	ab initio prediction:Prodigal:2.6,similar to AA sequence:UniProtKB:P39325	ABC transporter periplasmic-binding protein YtfQ
425	bin_62_contig00039:270-1088	8.01	9.92	8.57	9.05	renamed_bin_62_02276	renamed_bin_62	GO:0005198|GO:0009420|GO:0071973		hag_2	ab initio prediction:Prodigal:2.6,similar to AA sequence:UniProtKB:Q05203	Flagellin
426	bin_153_contig00088:879-1237	9.43	9.55	6.84	9.78	renamed_bin_153_01229	renamed_bin_153			ssrA	COORDINATES:profile:Aragorn:1.2	transfer-messenger RNA%2C SsrA
427	bin_75_contig00017:16883-17875	9.49	9.46	8.61	8.11	renamed_bin_75_01093	renamed_bin_75	GO:0018537|GO:0055114	1.5.98.2	mer	ab initio prediction:Prodigal:2.6,similar to AA sequence:UniProtKB:O27784	5%2C10-methylenetetrahydromethanopterin reductase
428	bin_26_contig00001:190840-193008	8.87	10.39	7.77	8.69	renamed_bin_26_00185	renamed_bin_26
429	bin_158_contig00004:38891-38980	7.01	8.6	10.08	10.07	renamed_bin_158_00183	renamed_bin_158
430	bin_126_contig00004:28622-29878	9.13	8.59	9.02	9.04	renamed_bin_126_00248	renamed_bin_126	GO:0005215|GO:0006810
431	bin_126_contig00010:37443-37518	9.49	9.52	8.6	8.21	renamed_bin_126_00531	renamed_bin_126
432	bin_106_contig00005:74362-75561	9.08	8.86	8.98	8.91	renamed_bin_106_00473	renamed_bin_106	GO:0005363|GO:0015768		cycB	ab initio prediction:Prodigal:2.6,similar to AA sequence:UniProtKB:O07009	Cyclodextrin-binding protein
433	bin_36_contig00015:321-1142	8.98	8.87	9.14	8.88	renamed_bin_36_01035	renamed_bin_36	GO:0005198|GO:0071973		hag_1	ab initio prediction:Prodigal:2.6,similar to AA sequence:UniProtKB:Q05203	Flagellin
434	bin_106_contig00007:61294-61572	9.33	9.14	8.84	8.77	renamed_bin_106_00623	renamed_bin_106	GO:0003677		hup	ab initio prediction:Prodigal:2.6,similar to AA sequence:UniProtKB:P0A3H1	DNA-binding protein HU
435	bin_51_contig00008:4946-5030	9.06	9.25	8.96	8.92	renamed_bin_51_00630	renamed_bin_51
436	bin_26_contig00005:34454-36130	9.01	10.52	8.42	8.26	renamed_bin_26_00535	renamed_bin_26
437	bin_75_contig00028:20242-21948	9.54	9.52	8.79	8.37	renamed_bin_75_01463	renamed_bin_75	GO:0015948|GO:0050524	2.8.4.1	mcrA	ab initio prediction:Prodigal:2.6,similar to AA sequence:UniProtKB:P07962	Methyl-coenzyme M reductase subunit alpha
438	bin_34_contig00003:52251-52599	8.93	8.84	8.82	9.7	renamed_bin_34_00497	renamed_bin_34			ssrA	COORDINATES:profile:Aragorn:1.2	transfer-messenger RNA%2C SsrA
439	bin_26_contig00008:23450-25999	8.59	10	9.02	8.78	renamed_bin_26_00660	renamed_bin_26
440	bin_106_contig00005:68133-68600	9.45	8.7	9.23	9.06	renamed_bin_106_00464	renamed_bin_106	GO:0006950|GO:0055114	1.16.-.-	dps2	ab initio prediction:Prodigal:2.6,similar to AA sequence:UniProtKB:Q8RPQ2	DNA protection during starvation protein 2
441	bin_89_contig00005:18550-18948	9.74	9.5	8.52	8.74	renamed_bin_89_00373	renamed_bin_89			ssrA	COORDINATES:profile:Aragorn:1.2	transfer-messenger RNA%2C SsrA
442	bin_106_contig00005:41211-42875	9.18	8.85	9.36	9.26	renamed_bin_106_00440	renamed_bin_106	GO:0043190|GO:0055085		appA_1	ab initio prediction:Prodigal:2.6,similar to AA sequence:UniProtKB:P42061	Oligopeptide-binding protein AppA
443	bin_47_contig00001:123353-123943	9.06	9.28	8.87	9.72	renamed_bin_47_00119	renamed_bin_47	GO:0004784|GO:0006801|GO:0046872|GO:0055114	1.15.1.1	sodB	ab initio prediction:Prodigal:2.6,similar to AA sequence:UniProtKB:P19665	Superoxide dismutase [Mn/Fe]
444	bin_20_contig00005:114206-115912	8.94	8.5	10.03	9.51	renamed_bin_20_00807	renamed_bin_20	GO:0015948|GO:0050524	2.8.4.1	mcrA	ab initio prediction:Prodigal:2.6,similar to AA sequence:UniProtKB:P07962	Methyl-coenzyme M reductase subunit alpha
445	bin_106_contig00010:32360-32605	9.45	9.24	9.39	9.12	renamed_bin_106_00789	renamed_bin_106	GO:0016209|GO:0016491|GO:0055114	1.11.1.15	prxU_2	ab initio prediction:Prodigal:2.6,similar to AA sequence:UniProtKB:Q9L3Q5	Selenocysteine-containing peroxiredoxin PrxU
446	bin_51_contig00008:41055-41492	9.71	9.38	9.18	8.95	renamed_bin_51_00681	renamed_bin_51	GO:0003735|GO:0005840|GO:0006412		rplM	ab initio prediction:Prodigal:2.6,similar to AA sequence:UniProtKB:Q72IN1	50S ribosomal protein L13
447	bin_51_contig00027:13885-14262	9.52	9.07	9.47	9.23	renamed_bin_51_01261	renamed_bin_51	GO:0005506	1.15.1.2	dfx	ab initio prediction:Prodigal:2.6,similar to AA sequence:UniProtKB:P20418	Desulfoferrodoxin
448	bin_20_contig00005:119767-119940	9.21	8.94	9.85	9.35	renamed_bin_20_00813	renamed_bin_20	GO:0015948|GO:0016020|GO:0030269	2.1.1.86	mtrF	ab initio prediction:Prodigal:2.6,similar to AA sequence:UniProtKB:P80654	Tetrahydromethanopterin S-methyltransferase subunit F
449	bin_111_contig00017:4568-5011	9.18	7.75	10.55	10.06	renamed_bin_111_00959	renamed_bin_111	GO:0005215|GO:0006810	2.7.1.197	mtlF	ab initio prediction:Prodigal:2.6,similar to AA sequence:UniProtKB:C0H3V2	Mannitol-specific phosphotransferase enzyme IIA component
450	bin_106_contig00007:45832-46107	9.33	9.74	9.16	9.35	renamed_bin_106_00609	renamed_bin_106	GO:0042710
451	bin_223_contig00002:39124-39312	8.75	9.46	9.33	10.06	renamed_bin_223_00087	renamed_bin_223
452	bin_51_contig00002:41207-41467	9.59	9.09	9.59	9.6	renamed_bin_51_00234	renamed_bin_51			spoVS_2	ab initio prediction:Prodigal:2.6,similar to AA sequence:UniProtKB:P45693	Stage V sporulation protein S
453	bin_96_contig00013:29787-30161	8.92	8.74	10.02	10.22	renamed_bin_96_00943	renamed_bin_96			ssrA	COORDINATES:profile:Aragorn:1.2	transfer-messenger RNA%2C SsrA
454	bin_326_contig00001:15629-16273	9.21	11.59	9.28	8.09	renamed_bin_326_00013	renamed_bin_326
455	bin_126_contig00008:27252-27515	9.45	9.53	9.62	9.77	renamed_bin_126_00446	renamed_bin_126	GO:0042710
456	bin_75_contig00026:8307-8984	9.64	9.47	9.91	9.35	renamed_bin_75_01390	renamed_bin_75	GO:0006740|GO:0016651|GO:0050661|GO:0055114|GO:0070967	1.5.1.40	fno	ab initio prediction:Prodigal:2.6,similar to AA sequence:UniProtKB:O26350	F420-dependent NADP reductase
457	bin_62_contig00005:93385-93739	8.69	10.36	8.95	10.44	renamed_bin_62_00688	renamed_bin_62			ssrA	COORDINATES:profile:Aragorn:1.2	transfer-messenger RNA%2C SsrA
458	bin_111_contig00046:19544-19903	9.8	9.25	9.82	9.7	renamed_bin_111_01816	renamed_bin_111			ssrA	COORDINATES:profile:Aragorn:1.2	transfer-messenger RNA%2C SsrA
459	bin_1046_contig00022:509-790	9.68	10.78	7.83	10.35	renamed_bin_1046_00091	renamed_bin_1046
460	bin_106_contig00006:59526-60116	10.03	9.78	9.33	9.63	renamed_bin_106_00549	renamed_bin_106	GO:0004523	3.1.26.4	rnhB	ab initio prediction:Prodigal:2.6,similar to AA sequence:UniProtKB:O31744	Ribonuclease HII
461	bin_20_contig00005:119000-119722	9.84	9.48	10.07	9.47	renamed_bin_20_00812	renamed_bin_20	GO:0006814|GO:0030269|GO:0050897	2.1.1.86	mtrA1_1	ab initio prediction:Prodigal:2.6,similar to AA sequence:UniProtKB:P80184	Tetrahydromethanopterin S-methyltransferase subunit A 1
462	bin_75_contig00028:25049-25789	10.52	10.33	9.36	8.86	renamed_bin_75_01468	renamed_bin_75	GO:0015948|GO:0016021|GO:0030269	2.1.1.86	mtrA1	ab initio prediction:Prodigal:2.6,similar to AA sequence:UniProtKB:P80184	Tetrahydromethanopterin S-methyltransferase subunit A 1
463	bin_55_contig00001:65358-65756	10.13	9.37	9.35	10.33	renamed_bin_55_00053	renamed_bin_55			ssrA	COORDINATES:profile:Aragorn:1.2	transfer-messenger RNA%2C SsrA
464	bin_51_contig00005:35390-35701	9.67	9.31	10.29	9.92	renamed_bin_51_00475	renamed_bin_51	GO:0003676
465	bin_51_contig00014:17126-17461	9.97	9.85	9.87	9.55	renamed_bin_51_00919	renamed_bin_51
466	bin_223_contig00002:38981-39127	9.37	10.04	9.93	10.25	renamed_bin_223_00086	renamed_bin_223
467	bin_106_contig00026:8935-9720	10.41	10.1	9.62	9.68	renamed_bin_106_01172	renamed_bin_106		3.1.3.-	yutF	ab initio prediction:Prodigal:2.6,similar to AA sequence:UniProtKB:O32125	Acid sugar phosphatase
468	bin_77_contig00007:101678-101857	8.8	9.87	10.4	10.81	renamed_bin_77_00833	renamed_bin_77
469	bin_49_contig00001:175905-176253	8.98	9.78	10.4	10.73	renamed_bin_49_00184	renamed_bin_49			ssrA	COORDINATES:profile:Aragorn:1.2	transfer-messenger RNA%2C SsrA
470	bin_22_contig00028:21289-21644	9.73	9.37	10.21	10.64	renamed_bin_22_01687	renamed_bin_22			ssrA	COORDINATES:profile:Aragorn:1.2	transfer-messenger RNA%2C SsrA
471	bin_47_contig00005:22623-23024	10.4	10.87	8.55	10.35	renamed_bin_47_00508	renamed_bin_47			ssrA	COORDINATES:profile:Aragorn:1.2	transfer-messenger RNA%2C SsrA
472	bin_75_contig00026:15584-16039	10.2	10.43	10.25	9.3	renamed_bin_75_01396	renamed_bin_75	GO:0016491|GO:0046872|GO:0055114
473	bin_106_contig00006:16954-17262	10.27	9.82	10.22	9.96	renamed_bin_106_00497	renamed_bin_106
474	bin_13_contig00002:74219-74571	10.08	10.08	10.04	10.08	renamed_bin_13_00422	renamed_bin_13			ssrA	COORDINATES:profile:Aragorn:1.2	transfer-messenger RNA%2C SsrA
475	bin_26_contig00006:52337-53014	9.56	11.18	9.45	10.21	renamed_bin_26_00604	renamed_bin_26	GO:0051920|GO:0055114	1.11.1.15	prxU	ab initio prediction:Prodigal:2.6,similar to AA sequence:UniProtKB:Q9L3Q5	Selenocysteine-containing peroxiredoxin PrxU
476	bin_1046_contig00022:248-508	10.49	11.04	8.35	10.6	renamed_bin_1046_00090	renamed_bin_1046
477	bin_24_contig00001:130587-130936	9.81	10.42	9.96	10.32	renamed_bin_24_00133	renamed_bin_24			ssrA	COORDINATES:profile:Aragorn:1.2	transfer-messenger RNA%2C SsrA
478	bin_25_contig00004:101213-101377	10.66	9.79	10.16	10.12	renamed_bin_25_00719	renamed_bin_25
479	bin_75_contig00011:33428-34300	10.58	10.33	10.48	9.76	renamed_bin_75_00820	renamed_bin_75	GO:0005215|GO:0006810|GO:0016020
480	bin_75_contig00031:18635-19708	10.98	11.08	9.85	9.37	renamed_bin_75_01529	renamed_bin_75	GO:0055114	1.1.1.103	tdh	ab initio prediction:Prodigal:2.6,similar to AA sequence:UniProtKB:O58389	L-threonine 3-dehydrogenase
481	bin_44_contig00006:51122-51519	10.9	10.76	10.38	10.72	renamed_bin_44_00943	renamed_bin_44			ssrA	COORDINATES:profile:Aragorn:1.2	transfer-messenger RNA%2C SsrA
482	bin_168_contig00005:9492-9671	11.02	10.83	10.22	11.08	renamed_bin_168_00169	renamed_bin_168
483	bin_54_contig00029:13493-13618	11.12	10.98	10.22	10.87	renamed_bin_54_01577	renamed_bin_54
484	bin_141_contig00015:375-632	11.11	10.37	11.09	10.76	renamed_bin_141_00593	renamed_bin_141	GO:0042710
485	bin_126_contig00001:76692-77054	11.54	11.14	10.35	10.75	renamed_bin_126_00079	renamed_bin_126	GO:0003677|GO:0006281		comEA	ab initio prediction:Prodigal:2.6,similar to AA sequence:UniProtKB:P39694	ComE operon protein 1
486	bin_20_contig00005:110999-112303	10.67	10.19	11.87	11.28	renamed_bin_20_00803	renamed_bin_20	GO:0050524	2.8.4.1	mcrB	ab initio prediction:Prodigal:2.6,similar to AA sequence:UniProtKB:P07955	Methyl-coenzyme M reductase subunit beta
487	bin_20_contig00005:112799-113422	10.92	10.39	11.95	11.41	renamed_bin_20_00805	renamed_bin_20			mcrC	ab initio prediction:Prodigal:2.6,similar to AA sequence:UniProtKB:P11566	Methyl-coenzyme M reductase I operon protein C
488	bin_20_contig00005:113419-114198	10.94	10.34	11.99	11.46	renamed_bin_20_00806	renamed_bin_20	GO:0015948|GO:0050524	2.8.4.1	mcrG	ab initio prediction:Prodigal:2.6,similar to AA sequence:UniProtKB:O27233	Methyl-coenzyme M reductase I subunit gamma
489	bin_75_contig00028:17029-18333	11.89	11.71	11	10.53	renamed_bin_75_01459	renamed_bin_75	GO:0050524	2.8.4.1	mcrB	ab initio prediction:Prodigal:2.6,similar to AA sequence:UniProtKB:P07955	Methyl-coenzyme M reductase subunit beta
490	bin_75_contig00028:19473-20234	12	11.88	11.19	10.72	renamed_bin_75_01462	renamed_bin_75	GO:0015948|GO:0050524	2.8.4.1	mcrG	ab initio prediction:Prodigal:2.6,similar to AA sequence:UniProtKB:O27233	Methyl-coenzyme M reductase I subunit gamma
491	bin_20_contig00005:112321-112797	11.23	10.67	12.48	11.86	renamed_bin_20_00804	renamed_bin_20	GO:0015948		mrtD	ab initio prediction:Prodigal:2.6,similar to AA sequence:UniProtKB:Q50485	Methyl-coenzyme M reductase II operon protein D
492	bin_75_contig00028:18831-19454	12.2	12.03	11.31	10.84	renamed_bin_75_01461	renamed_bin_75			mcrC	ab initio prediction:Prodigal:2.6,similar to AA sequence:UniProtKB:P11566	Methyl-coenzyme M reductase I operon protein C
493	bin_75_contig00028:18353-18829	12.3	12.18	11.52	11.01	renamed_bin_75_01460	renamed_bin_75	GO:0015948		mcrD	ab initio prediction:Prodigal:2.6,similar to AA sequence:UniProtKB:O27235	Methyl-coenzyme M reductase I operon protein D
494	bin_75_contig00031:18428-18583	12.5	12.46	11.41	10.85	renamed_bin_75_01528	renamed_bin_75
495	bin_54_contig00019:28685-29057	12.59	12.26	11.16	11.46	renamed_bin_54_01365	renamed_bin_54			ssrA	COORDINATES:profile:Aragorn:1.2	transfer-messenger RNA%2C SsrA
496	bin_168_contig00259:49-403	12.91	12.93	11.65	13.42	renamed_bin_168_01767	renamed_bin_168			ssrA	COORDINATES:profile:Aragorn:1.2	transfer-messenger RNA%2C SsrA
497	bin_26_contig00005:38873-39236	12.6	14.26	12.44	13.11	renamed_bin_26_00537	renamed_bin_26			ssrA	COORDINATES:profile:Aragorn:1.2	transfer-messenger RNA%2C SsrA
498	bin_65_contig00024:14812-15208	14.64	14.31	13.65	13.72	renamed_bin_65_01296	renamed_bin_65			ssrA	COORDINATES:profile:Aragorn:1.2	transfer-messenger RNA%2C SsrA
499	bin_126_contig00021:22309-22661	14.32	14.76	14.4	14.37	renamed_bin_126_00847	renamed_bin_126			ssrA	COORDINATES:profile:Aragorn:1.2	transfer-messenger RNA%2C SsrA
500	bin_57_contig00011:30875-31270	14.49	13.86	15.38	15.28	renamed_bin_57_00974	renamed_bin_57			ssrA	COORDINATES:profile:Aragorn:1.2	transfer-messenger RNA%2C SsrA
